1     **Proteogenomic Discovery of Neoantigens Facilitates Personalized Multi-antigen Targeted T cell**  
2                                                 **Immunotherapy for Brain Tumors**

3     Samuel Rivero-Hinojosa PhD<sup>1</sup>, Melanie Grant PhD<sup>1,2</sup>, Aswini Panigrahi PhD<sup>1</sup>, Huizhen Zhang MD<sup>1</sup>,  
4     Veronika Caisova PhD<sup>1</sup>, Catherine M. Bollard MD<sup>1,3</sup>, Brian R. Rood MD<sup>1</sup>.

5

6     <sup>1</sup>Center for Cancer and Immunology Research, Children's National Research Institute, Washington DC

7     <sup>2</sup>Emory University School of Medicine, Department of Pediatrics, Atlanta, GA

8     <sup>3</sup>George Washington University Cancer Center

9

10

11     **Disclosure of Conflicts of Interest**

12     The authors have no conflicts of interest to declare.

13 **ABSTRACT**

14 Neoantigen discovery in pediatric brain tumors is hampered by their low mutational burden and scant tissue  
15 availability. We developed a low-input proteogenomic approach combining tumor DNA/RNA sequencing  
16 and mass spectrometry proteomics to identify tumor-restricted (neoantigen) peptides arising from multiple  
17 genomic aberrations to generate a highly target-specific, autologous, personalized T cell immunotherapy.  
18 Our data indicate that novel splice junctions are the primary source of neoantigens in medulloblastoma, a  
19 common pediatric brain tumor. Proteogenomically identified tumor-specific peptides are immunogenic and  
20 generate MHC II-based T cell responses. Moreover, polyclonal and polyfunctional T cells specific for  
21 tumor-specific peptides effectively eliminated tumor cells in vitro. Targeting novel tumor-specific antigens  
22 obviates the issue of central immune tolerance while potentially providing a safety margin favoring  
23 combination with other immune-activating therapies. These findings demonstrate the proteogenomic  
24 discovery of immunogenic tumor-specific peptides and lay the groundwork for personalized targeted T cell  
25 therapies for children with brain tumors.

## 26 INTRODUCTION

27 Medulloblastoma (MB) is the most common malignant brain tumor of childhood and carries overall  
28 survival rates between 25-75% depending on molecular subgroup, metastatic status, and age at diagnosis<sup>1</sup>.  
29 Effective therapy requires intensive chemo- and radiation therapies, leaving survivors with significant long-  
30 term burdens including life-altering cognitive deficits. If the tumor recurs after chemo-radiotherapy, there  
31 are no standard effective therapies and virtually no long-term survivors. Therefore, there is an urgent need  
32 to develop new therapeutics that can augment standard therapies to effectively prevent tumor recurrence  
33 without increasing toxicity. A promising strategy is the use of T cells targeting tumor-specific antigens  
34 (TSA), which can: (1) actively home to sites of disease, including across the BBB; (2) possess exquisitely  
35 sensitive peptide antigen recognition that may differ from their irrelevant counterparts by a single amino  
36 acid<sup>2,3</sup>; and (3) mediate continued, life-long protection through generation of immune memory<sup>4</sup>.

37 Strategies to expand T cell populations with specificity for multiple antigens expressed by a range  
38 of malignancies have been developed<sup>5,6</sup>. Targeting multiple antigens reduces the possibility of tumor  
39 resistance through antigen escape since selection pressure is not applied to a single target<sup>7,8</sup>. In addition,  
40 targeting multiple antigens more effectively addresses intra-tumoral antigen heterogeneity. Ex vivo  
41 expanded T cells targeting tumor-associated antigens (TAA) derived from differentiation antigens or cancer  
42 testis antigens have been evaluated in different cancer types<sup>9-13</sup>; however, these approaches may be limited  
43 by central tolerance toward antigens that are not wholly “foreign” as well as by the potential for on-target,  
44 off-tumor auto-immune toxicity<sup>14</sup>. When applied to solid tumors, additional challenges arise from the  
45 immunosuppressive tumor microenvironment. To enhance efficacy, it will be necessary to combine T cell  
46 therapies with immune adjuvants to boost immune activation and subvert the immunosuppressive tumor  
47 microenvironment. We propose that developing T cells targeting tumor-specific antigens (TSA), as opposed  
48 to tumor-associated antigens (TAA), will potentially increase the potency of tumor antigen-specific T cell  
49 products while decreasing the potential for toxicity, especially when administered in combination with  
50 immune adjuvants.

51 To identify sufficient TSA for multi-antigen targeting, it is necessary to expand their sources  
52 beyond somatic mutations alone. This is especially true for pediatric cancers which have many fewer  
53 mutations than to their adult counterparts<sup>15</sup>. There are two main strategies to identify TSA. The first relies  
54 on identification of non-canonical transcriptomic or exome sequencing reads followed by HLA binding  
55 prediction and large-scale immunogenicity assays<sup>16,17</sup>. However, this approach results in many false  
56 discoveries, relies on error-prone HLA binding prediction algorithms, and ignores the fact that many  
57 transcripts are not translated into proteins. The second strategy is the direct immunoprecipitation of MHC-  
58 peptide complexes from tumor cells and identification of bound peptide sequences by liquid

59 chromatography-mass spectrometry (LC-MS/MS) with subsequent matching to exome or transcriptomic  
60 reads. This strategy, called ligandomics, is limited by the efficiency of immuno-precipitation, the large  
61 amount of tissue required (infeasible for pediatric brain tumors), the need for robust tumor cell MHC  
62 expression, the identification of relatively few peptides, and low throughput<sup>18,19</sup>.

63 To counter these limitations, we present a personalized, low-input (10-15 mg of tumor tissue)  
64 proteogenomic approach to identify TSAs resulting from an individual tumor's genomic aberrations and  
65 their use to manufacture T cells specific for multiple TSAs. We effectively identify TSAs arising from four  
66 types of genomic events: small insertions/deletions, single nucleotide variations (SNVs), fusions and novel  
67 splice junctions. To verify that our findings are not simply unannotated normal proteins, we also developed  
68 a multi-step strategy to ensure that the novel peptides are not present in normal tissues. This approach  
69 succeeds in identifying a mean of tens of neoantigens per tumor, making multi-antigen targeting possible.  
70 As a proof-of-principle, we demonstrate that T cells selected and expanded in response to these peptides  
71 contain both CD4 and CD8 populations and are immunogenic, as demonstrated by cytokine profiling and  
72 robust cytotoxicity *in vitro*. We posit that this tool can be used to identify personalized TSA peptides for  
73 the creation of a T cell therapy using autologous TSA peptide-loaded dendritic cells to select and expand  
74 autologous T cells.

75

## 76 RESULTS

### 77 **Low-input proteogenomic workflow identifies multiple neoantigen peptides from individual** 78 **medulloblastoma tumors**

79 Pediatric brain tumors present a difficult challenge for immunotherapy development given their  
80 low mutational burden, location behind the BBB in an immunosuppressive tumor microenvironment, intra-  
81 tumoral heterogeneity and the frequently small amount of tumor tissue available for multiple diagnostic  
82 demands. We developed a low-input personalized proteogenomic approach for the identification and  
83 curation of tumor-specific neoantigens, which can be used to generate T cells, for autologous use, that are  
84 specific for multiple neoantigens in pediatric brain tumors (Figure 1).

85 In order to identify novel tumor-specific genomic events, we obtained 46 freshly frozen tumor  
86 tissues and high coverage whole genome sequencing (WGS) and RNA-seq data from the Children's Brain  
87 Tumor Network (CBTN) (Supplementary dataset 1). Four different types of tumor-specific genomic events  
88 were identified from genomic data: gene fusions, novel splice junctions, small insertions/deletions and  
89 single nucleotide variants (SNVs). Gene fusions were called using three different algorithms: STAR-  
90 Fusion<sup>20</sup>, ericscript<sup>21</sup> and Defuse,<sup>22</sup> with different numbers of intra- and inter-chromosomal fusions detected  
91 per tumor, a mean of 1,044 inter- and intra-chromosomal gene fusions per tumor were detected  
92 (Supplementary Fig. 1a). Coding SNVs were called on WGS using the GATK pipeline<sup>23</sup>, detecting a mean  
93 of 0.8 coding mutations per Mb (Supplementary Fig. 1b). As expected, the number of SNVs indicates a low  
94 mutational burden as previously described for medulloblastoma<sup>6</sup>. Novel junctions were considered if the  
95 junction was supported by more than 5 reads and was not present in the human Ensembl version 84  
96 transcript annotation, detecting a mean of 12 novel junctions per Mb of the human genome (Supplementary  
97 Fig. 2). We detected a mean of 39,000 novel genomic events with the majority (37,000) belonging to the  
98 novel splice junction category (Fig. 2a). The novel genomic events for each tumor were translated into 1, 3  
99 or 6 frames depending on the event and included in individualized databases (one for each tumor) together  
100 with the normal human proteome from UniProt (UP000005640, See Methods section for details).

101 MHC class I molecules typically present 8-10 amino acid peptides while MHC class II presents 11-  
102 30 amino acid peptides<sup>24</sup>. Our translational workflow employs autologous dendritic cells (DCs) to process  
103 tumor-specific peptides to the proper length and sequence for efficient MHC binding in the appropriate  
104 autologous HLA context. To test whether the lengths of the identified peptides were suitable to generate  
105 both MHC class I and II T cell responses after DC processing, we compared Lys-C and trypsin enzymatic  
106 digestion of the 7316-3778 tumor lysate. We also induced missed cleavages by reducing the digestion time  
107 to obtain longer average peptides, with an intent to yield more potential tumor-specific peptides suitable  
108 for MHC class I and II presentation after DCs processing. For this tumor, the Lys-C enzyme, which cleaves

109 proteins only at lysine, resulted in peptides with a median of 17 amino acids in contrast to a median of 15  
110 for trypsin digestion, which cleaves proteins at lysine and arginine (Supplementary Fig. 3a). These results  
111 indicate that Lys-C yielded longer peptides suitable to elicit both MHC Class I and II T cell responses after  
112 DCs processing.

113 We next performed high-resolution LC-MS/MS on the same panel of freshly frozen tumors for  
114 which we previously created individualized protein databases (Fig. 1, Supplementary dataset 1) using total  
115 protein lysates partially digested with LysC. In addition to the tumors, we also performed LC-MS/MS on  
116 five healthy childhood cerebellums for comparison. LS-MS/MS spectra from MB tumors and healthy  
117 cerebellums were searched together against the individualized tumor databases described above. Full and  
118 partial LysC digest (i.e., cleavage at a minimum of one C-terminal Lys) searches were performed. A total  
119 of 241,224 unique peptides were identified across the sample set with an average of 33,576 peptides per  
120 tumor with a 1% FDR (Supplementary Fig. 3b, Supplementary dataset 2). In order to reduce the potential  
121 for false discovery in our proteogenomic findings, we developed a filtration strategy to remove peptides  
122 from annotated and unannotated normal proteins while preserving novel tumor-specific peptides from  
123 undiscovered protein-coding loci (Supplementary Fig. 4). We first removed all peptides matched to the  
124 human UniProt proteome and all novel peptides found in healthy childhood cerebellum. Additionally,  
125 peptides with a length < 8-mer and an Xcorr < 1 were culled. Xcorr (cross correlation) is a measure of the  
126 “goodness of fit” of experimental peptide fragments to theoretical spectra created from the predicted b and  
127 y ions. Xcorr > 1 was selected based on our experience identifying confident matches between experimental  
128 and theoretical spectra. Next, the novel identified peptides were processed through BLASTP<sup>25</sup> to remove  
129 exact matches to known proteins from the Human NCBI(GRCh38), RefSeq, UniProt Isoforms proteome  
130 (UP000005640), neXtProt, and Ensembl (version 84) protein annotations. Overall, 481 novel peptides were  
131 identified, and 17 (3.53 %) peptides were removed as they were also present in normal cerebellar tissues  
132 (Figs. 2b and 2c). Finally, we removed peptides that originate from novel genomic events also present in  
133 normal healthy tissues from The Genotype-Tissue Expression (GTEx) project (Supplementary dataset 1);  
134 102 (21%) peptides were removed as the same genomic event that originates that peptide were detected in  
135 the GTEx RNA-seq collection. After these filtration steps, we identified a total of 362 novel unique  
136 peptides across all 46 MBs (Fig. 2b and 2c, Supplementary dataset 3). A total of 230 novel peptides  
137 originated from novel junctions, 85 from SNVs, and 49 from gene fusions across all MB tumors analyzed.  
138 Thus, novel junctions are the main source of neoantigens identified in medulloblastoma tumors (Fig. 2b  
139 and 2c). On a per tumor basis, a mean of 9 novel peptides were identified (range 1-43) with an average of  
140 5.9 originating from novel junctions, 1.1 from gene fusions and 1.8 from SNVs (Fig. 2b and 2c). The vast  
141 majority of these tumor specific peptides were non-overlapping between the tumors. These results indicate

142 that this approach identifies a significant number of high confidence tumor specific peptides from minimal  
143 input tissue and that novel splice junctions are the main source of neoantigens in MB tumors<sup>26</sup>.

#### 144 **Tumor-specific peptides were validated by retention time and spectral match**

145 We employed three methods to evaluate the validity of the peptides discovered by our approach.  
146 First, we correlated the mean retention time (RT) of the identified peptides to their predicted hydrophobicity  
147 index (HI). The HI is a relative value that corresponds to the organic solvent concentration at which the  
148 peptide elutes from the HPLC system and is proportional to the retention time. The predicted HI for the  
149 UniProt matched peptides, calculated with the SSRCalc tool<sup>27</sup>, shows a significant positive correlation with  
150 the experimental RT as shown in Supplementary Fig. 5 with a distribution along the regression line.  
151 Similarly, the predicted HI of the tumor-specific peptides have significant positive correlations with the  
152 retention times supporting their accurate amino acid sequence (Supplementary Fig. 5a). Second, we used  
153 AutoRT<sup>28</sup>, a retention time prediction algorithm based in deep learning. A learning model was created  
154 using all peptides identified in our cohort (MB model) and applied to a subset of random identified uniprot  
155 peptides and to all specific peptides (Supplementary Fig. 5b). We identified significant positive correlations  
156 (p-values shown in the Supplementary Fig. 5b) between predicted retention times and experimental  
157 retention times using the MB model for both UniProt and tumor-specific peptides, (Supplementary Fig. 5b,  
158 left panel). We next used a completely independent learning model created using the PXD006109 dataset<sup>29</sup>,  
159 to evaluate retention times of our peptides. Using this independent dataset, we found significant positive  
160 correlations (p-values shown in the Supplementary Fig. 5b) between predicted retention times and  
161 experimental retention for both UniProt and tumor specific peptides (Supplementary Fig. 5b, right panel).  
162 Third, synthetic versions of 7 tumor specific peptides from patient 7316-3778 were analyzed and, as shown  
163 in Supplementary Fig. 6, their MS/MS spectra and retention times were identical to those detected  
164 endogenously (Supplementary Fig. 6). These results indicate that our “proof of principle” proteomic  
165 approach properly identifies novel MB tumor-specific peptides.

#### 166 **Tumor-specific peptide frequency**

167 Although most of these tumor specific peptides were non-overlapping between the tumors, 18 of  
168 362 (4.97%) were identified in more than one tumor; 12 of them (3.3%) were found in 2 tumors and 6 of  
169 them (1.6%) were identified in 5 or more tumors (Supplementary Fig. 7). Only one peptide,  
170 NSSVSGIFTFQK, was identified in more than 20% (12 of 46) of the samples. All of these shared peptides  
171 result from novel splice junctions. The peptide NSSVSGIFTFQK can arise from a number of different  
172 novel junction events in the DDX31 gene. We detected novel alternative splicing between the exon 14 and

173 exons 17, 18 and 19. In addition, we detected a novel junction between intron 13 and exon 14. This novel  
174 junction changes the frame of exon 14, originating the peptide NSSVSGIFTFQK. Interestingly, The splicing  
175 between exon 14 and exon 17, 18 and 19 returns to the canonical frame for the DDX31 protein. The  
176 annotated splicing between the Exon 14 and 15 will introduce stop codons as consequences of this change  
177 in the frame of exon 14.

178 DDX31 is a DEAD-box RNA helicase conserved across eukaryotes, but it has not been extensively  
179 studied. DDX31 was found to be mutated in several group 4 medulloblastomas in a previous sequencing  
180 study<sup>30</sup>. Complex rearrangement and focal deletions of the DDX31 gene have also been observed in several  
181 Group 4 medulloblastomas; these deletions occur concurrently with amplification of the OTX2 locus, a  
182 known medulloblastoma oncogene<sup>31,32</sup>. This finding suggests that DDX31 mutation (either by deletion or  
183 truncation) may cooperate with the oncogenic role of OTX2. Linking our findings to previously published  
184 work, such a deletion or rearrangement could originate the NSSVSGIFTFQK peptide by modifying the  
185 splicing partner of DDX31. In addition, novel peptides arising from novel junctions in the genes CARF,  
186 EEA1, LMNB1, LIZIC and VANGL2 have been discovered with lower frequency in 5 out of 46 tumors  
187 (Supplementary Fig. 7).

#### 188 **TSA-specific T cells respond to medulloblastoma tumor-specific neoantigens**

189 As a further “proof of principle” to determine the clinical feasibility of using this neoantigen  
190 identification approach to create an autologous T cell immunotherapy product from heavily pre-treated  
191 patients, we identified a subject (Patient ID: 7316-3778) from whom tumor tissue and blood were available.  
192 Employing our proteogenomic pipeline, we identified 25 novel unique peptides. Among these 25 peptides,  
193 3 peptides were also identified in the healthy cerebellum proteome. In addition, we discovered that the  
194 genomic events giving rise to 6 novel peptide sequences were present in normal tissues from GTEX. After  
195 removal of those normal unannotated peptides, we were left with 17 novel unique peptides derived from  
196 this subject’s tumor sample. One peptide resulted from a fusion, 2 from SNVs and 14 from novel junctions  
197 (Fig. 3a).

198 To create an autologous Tumor Specific Antigen T cell product (TSA-T) specific for this patient’s  
199 newly identified tumor-specific peptides, we stimulated their peripheral blood mononuclear cells (PBMC)  
200 with antigen presenting cells (dendritic cells; DC) pulsed with 15 out of 17 peptides derived from patient  
201 7316-3778’s tumor (two peptides could not be synthesized; Supplementary dataset 4). Peptide-pulsed DC  
202 stimulation was repeated on days 7 (2<sup>nd</sup> stimulation) and day 14 (3<sup>rd</sup> stimulation). Seven days after the 3<sup>rd</sup>  
203 stimulation, the polyclonality and polyfunctionality of the resultant T cells were evaluated using anti-  
204 interferon gamma (IFN- $\gamma$ ) ELISpot assay and intracellular flow cytometric staining for IFN- $\gamma$  and tumor  
205 necrosis factor alpha (TNF- $\alpha$ ). TSA-T cell products stimulated with DCs loaded with 13/15 peptides elicited



206 a statistically significant IFN- $\gamma$  response (Fig. 3b). This response was reproducible even when using  
207 cryopreserved, thawed and rested TSA-T cells as opposed to fresh product.

208 The TSA-T cell product derived from patient 7316-3778 was polyclonal comprising 93% CD3+,  
209 31% CD8+, 29% CD4+, 9.42% NKT, and 2.11% NK cells. The differentiation and memory status included  
210 primarily TEM (CD4+: 44%, CD8+: 21%) and TCM (CD4+: 16%, CD8+: 44%) with minimal TEFF and  
211 TSCM populations (Fig. 3c). TSA-T cells primed and expanded with autologous tumor-specific peptides  
212 comprised approximately equal proportions of CD8+ (31%) and CD4+ T cells (29%). TSA-T cells showed  
213 polyfunctionality producing IFN- $\gamma$ , TNF- $\alpha$  or both in response to peptide loaded DCs. Polyfunctional  
214 responses were observed in both CD8+ (IFN- $\gamma$ : 3.1%; TNF- $\alpha$ : 2.71%; IFN- $\gamma$ + TNF- $\alpha$ +: 1.55%) and CD4+  
215 cells (IFN- $\gamma$ : 3.25%; TNF- $\alpha$ : 5.70%; IFN- $\gamma$ +TNF- $\alpha$ +: 6.66%). As expected, CD8+ and CD4+ T cells did  
216 not produce TNF- $\alpha$  and/or IFN- $\gamma$  in the presence of peptides that were not presented by DCs (Fig. 3d and  
217 Supplementary Fig. 8). Thus, antigen presenting cells pulsed with TSA peptides can prime and expand  
218 autologous T cells comprising a polyfunctional polyclonal population of CD4 and CD8 cells with robust  
219 TEM and TCM fractions (Fig. 3d and Supplementary Fig. 8).

220 Conventional assays such as anti-IFN- $\gamma$  ELISpot and intracellular flow cytometry for detecting  
221 tumor-specific T cell responses in cancer patients can underestimate the breadth of antigen-specific T cell  
222 responses, and do not assess antigen-specific T-cell repertoires<sup>33</sup>. Therefore, we also performed T cell  
223 receptor V $\beta$  sequencing to evaluate the expansion of autologous antigen-specific clones. Dominant clones  
224 were identified with the top TCR clone accounting for 18% of all unique rearrangements and the top 10  
225 clones making up 43.77% of all TCRs (Fig. 3e and Supplementary dataset 5). Thus, in combination with  
226 the ELISpot data, TCR sequencing further supported that the presence of multiple specifically expanded  
227 clones within this patient's TSA-T cell product.

## 228 **TSA-specific T cells can be generated from medulloblastoma cell line-derived neoantigens**

229 The preceding findings demonstrate a proteogenomic approach to identifying novel tumor-specific  
230 peptides and their ability to select and expand a mixed lineage, multi-functional, multi-antigen specific  
231 autologous TSA-T cell product. The last remaining measure of activity to be demonstrated is the ability of  
232 TSA-T cell products to recognize and lyse tumor cells. Because there was no autologous tumor cell line  
233 was generated from this subject's tumor tissue, it was necessary to replicate the previous steps using *in vitro*  
234 MB cell lines. Using four MB cell lines (D556, MB002, MB004, and D283), we generated high coverage  
235 RNA-seq data from poly-A RNA and three distinct types of tumor-specific genomic events were identified  
236 from genomic data: gene fusions, novel splice junctions and small insertions/deletions (SNVs). We detected

237 a mean of 67,000 novel events with the majority (59,000) of them belonging to the novel splice junction  
238 category (Fig. 4a). We detected a mean of 6,000 inter- and intra-chromosomal gene fusions per cell line,  
239 0.7 coding mutations per Mb, and 20 novel junctions per Mb of the human genome (Supplementary Fig.  
240 9a, 9b and 9c). These novel genomic events were translated into 1, 3 or 6 frames depending on the event  
241 and included in cell line-specific databases together with the normal human proteome from UniProt (See  
242 Methods section for details).

243 Similar to the approach used for identifying TSAs from primary MB tumor tissues, we performed  
244 global high-resolution peptide LC-MS/MS on the MB cell lines using total protein lysates after protease  
245 digestion. Applying the same proteogenomic cohort described for MB tumors a total of 100,771 unique  
246 peptides were identified across datasets with an average of 53,649 peptides per cell line with a 1% FDR  
247 (Supplementary Fig. 9d and Supplementary dataset 6). The removal of normal peptides (from UniProt and  
248 our BLASTP approach) and unannotated peptides found in the healthy cerebellum proteome reduced the  
249 number to 53, 75, 74, and 132 novel peptides remained for the D556, MB002, MB004 and D283 cell lines,  
250 respectively (Fig. 4b and 4c). Finally, we removed novel peptides that originate from novel genomic events  
251 also present in normal healthy tissues from The Genotype-Tissue Expression (GTEx) project  
252 (Supplementary dataset 1 and Fig. 4c). We identified a total of 269 unique novel peptides across the four  
253 MB cell lines - 47, 62, 68, and 100 novel peptides in the D556, MB002, MB004 and D283 lines, respectively  
254 (Supplementary dataset 7). The vast majority of these were non-overlapping between the cell lines.  
255 Moreover, no peptides were found to be in common between cell lines and primary tumor tissues. In regard  
256 to the types of genomic events giving rise to novel peptides, 157 originated from novel junctions, 37 from  
257 SNVs, and 75 from gene fusions (Fig. 4b and 4c). These results indicate that novel splice junctions are also  
258 the main source of neoantigens in MB cell lines.

259 We then investigated whether neoantigens discovered in the MB002 and D556 cell lines using our  
260 proteogenomic strategy would be recognized as immunogenic by HLA-matched donor-derived T cells  
261 (Supplementary dataset 8). We stimulated these donor-derived T cells with DCs derived from the same  
262 donor and pulsed with the novel tumor-specific peptides identified from the MB002 or D556 MB cell lines  
263 (Supplementary dataset 9). We validated these novel MB cell line-specific peptides against synthetic  
264 versions and showed that their MS/MS spectra and elution times matched those found in the cell lines  
265 (Supplementary Fig. 10 and Supplementary Fig. 11). Seven days after the 3rd stimulation, the TSA-T cells  
266 were re-stimulated with DC pulsed with MB cell line-specific peptides and assessed by anti-IFN- $\gamma$  ELISpot  
267 and intracellular flow cytometric staining for IFN- $\gamma$  and TNF- $\alpha$ ) TSA-T cells stimulated with DCs pulsed  
268 with peptides discovered from the MB002 cell line were evaluated in three healthy donors. In Donor 1, a  
269 significant IFN- $\gamma$  T cell response to the pool of all the MB002 peptides was observed (p-value=2.01e-4  
270 compared to actin and p-value=1.97e-4 compared to unrelated D556 peptides), while no response was

271 observed to DMSO, Actin or unrelated (D556 pep) peptides (Fig. 5a). To determine whether this response  
272 was MHC-restricted, we incubated MB002 TSA-T cells with pooled MB002 peptide-pulsed DCs in the  
273 presence of anti-MHC Class I or class II blocking antibodies. No reduction was observed in the presence  
274 of anti-MHC Class I antibody. A significant reduction (80%, p-value =  $6.29 \times 10^{-4}$ ) occurred in the presence  
275 of anti-MHC Class II antibody (Fig. 5a), which correlated with the autologous data that also demonstrated  
276 a predominant CD4<sup>+</sup> restricted TSA-specific T cell response. To assess the individual contribution of each  
277 peptide to the T cell response, we plated MB002 TSA-T cells with DCs loaded with each individual TSA  
278 peptide. In Donor 2, a significant response to peptides 6 and 7 was observed, similar in size to the pooled  
279 peptides (p-value =  $2.0 \times 10^{-4}$ ,  $7.76 \times 10^{-6}$  and  $3.15 \times 10^{-3}$  for pooled peptides (MB002 Pep), Peptide 6 and Peptide 7  
280 respectively, Fig. 5b and Supplementary Fig. 12b). Lower frequency, but significant specific responses to  
281 peptides 6 and 7 were also observed in healthy Donor 3-derived TSA-T (p-value = 0.0096, 0.0048 and  
282 0.0082 for pooled peptides (MB002 Pep), Peptide 6 and 7 respectively, Supplementary Fig. 12a).

283 We further mapped the MHC class II-restricted responses identified in TSA-T cells that had been  
284 generated from healthy Donor 1 using DC pulsed with MB002-derived peptides. TSA-T were stimulated  
285 with DCs pulsed with “mini pools” (3-4 peptides/ pool) in the presence of anti-MHC class I and class II  
286 blocking antibodies (Supplementary Fig. 12c and 12d). In the presence of MHC-II-blocking antibodies, the  
287 frequency of SFU was significantly reduced by approximately 50% in peptide pool 7-10 (p-value = 0.040).  
288 A similar reduction of 50% was observed in pool 4-6 however this reduction was not significant. In contrast,  
289 in the presence of MHC I-blocking antibodies the frequency of SFU in peptide pools 4-6 and 7-10 was not  
290 significantly reduced. These data further confirmed that these peptides were recognized in the context of  
291 MHC class II mimicking the autologous result. Only the pools containing peptides 6 (pool 4-6) and 7 (pool  
292 7-10) showed robust responses, which were reduced by anti-MHC class II, confirming that this class II-  
293 restricted epitope spanned peptides 6 and 7 corresponding to sequence KASELDYITYLSIFDQLFDIPK  
294 (Fig. 5A, and Supplementary Fig. 12c and 12d).

295 To evaluate reproducibility beyond a single tumor cell line, TSA peptides identified from the D556  
296 MB cell line were tested in the same way as MB002-derived TSA peptides in two healthy donors (Donors  
297 4 and 5). IFN- $\gamma$  release, indicating a positive T cell response, was likewise observed for 2 and 1 (out of 21)  
298 D556 peptides in healthy Donor 4 (Supplementary Fig. 13a) and healthy Donor 5 (Supplementary Fig. 13b)  
299 derived TSA-T products respectively. Together these results demonstrate that novel peptides identified in  
300 MB002 and D556 MB cell lines were able to prime and stimulate TSA-specific T cells in a partially HLA-  
301 matched allogeneic setting.

302 The phenotype of expanded TSA-T products stimulated with MB002 or D556 tumor cell line-  
303 derived peptides was evaluated by 11-colour flow cytometry. All populations comprised primarily CD3<sup>+</sup>  
304 T cells (median: 91%; range: 77-95%) with variable compositions of CD8<sup>+</sup> T cells (37%; 17 – 55%), CD4<sup>+</sup>

305 T cells (23.5%; 5 - 40%), NKT cells (37%; 18 – 64%), TCR $\gamma\delta$  cells (8%; 0.3 – 31%), and NK cells (1.85%;  
306 0.46 – 8.5%) (Fig. 5c). The differentiation and memory status were likewise variable across donors with T  
307 effector memory (TEM) populations with a range of CD8<sup>+</sup> (2.5 – 91%) and CD4<sup>+</sup> (8.9 – 67%) T cells. The  
308 NKT cell proportions reflects our experience with clinical trial products manufactured using the same  
309 methods to generate tumor associated antigens (TAAs)<sup>34</sup>. T central memory (TCM) cells, shown to be  
310 important for long-term persistence of adoptively transferred T cells in vivo<sup>35</sup>, also varied greatly between  
311 donors (CD8<sup>+</sup> range: 0.43 – 67%; CD4<sup>+</sup> range: 1.9 – 26%). Minimal numbers (< 1%) of T effector cells  
312 (TEFF) or stem cell memory T cells (TSCM) were detected (Fig. 5c).

313 To evaluate the polyfunctionality (TNF- $\alpha$  and IFN- $\gamma$ -production) of TSA-T cells derived from  
314 Donor 2, we stimulated TSA-T with MB002 peptides and intracellularly labeled them with antibodies  
315 against IFN- $\gamma$  and TNF- $\alpha$  (Fig. 5d and Supplementary Fig. 14a). In agreement with the ELISpot (Fig. 5a),  
316 Donor 2's CD4<sup>+</sup> T cells produced IFN- $\gamma$  &/or TNF- $\alpha$  in response to pooled MB002 peptides, and peptides  
317 6 and 7 (7.1% and 6.3% respectively; Fig. 5d and Supplementary Fig. 14a). Thus, the intracellular cytokine  
318 data corroborated the HLA-blocking ELISpot results, supporting the evidence that the epitope spanning  
319 peptides 6 and 7 (sequence KASELDYITYLSIFDQLFDIPK) is class II-restricted.

320 Similarly, following stimulation with D556 cell line-specific peptides, CD4<sup>+</sup> T (but not CD8<sup>+</sup>) cells derived  
321 from healthy donor 4 secreted IFN- $\gamma$  and TNF- $\alpha$  in response to peptides 6 (2.95%) and 20 (4%)  
322 (Supplementary Fig. 14b and 14c). In summary, multiple CD4-mediated responses were observed in  
323 healthy donor-derived TSA-T cell products primed and expanded with DCs pulsed with peptides from  
324 MB002 and D556 cell lines. Moreover, these data confirm that we have established a robust approach to  
325 generate polyclonal and polyfunctional TSA-T cells products recognizing novel tumor specific peptides  
326 identified using our proteogenomic strategy.

### 327 **TSA-T cell products are cytolytic against tumor targets in vitro**

328 The cytolytic function of healthy donor derived TSA-T was evaluated against the MB002 cell line  
329 (Fig. 6 and Supplementary Fig. 17). The TSAT product used in this assay was derived from Donor 1 which  
330 matched the MB002 cell line at 4 HLA alleles (Supplementary dataset 8). Despite low expression of MHC  
331 Class I and Class II on MB002 cells (Supplementary Fig. 19), TSA-T induced significant lysis of MB002  
332 cells, with only 15% of MB002 cells remaining after 94 hours co-culture compared with non-specifically  
333 activated T cells (NST; PHA blasts) (80%, p-value=0.0006) and untreated MB002 cells (287%, p-  
334 value=0.0002) (Fig. 6a and 6b). To demonstrate the reproducibility of this approach, the assay was repeated  
335 in a subsequent experiment using a TSA-T product derived from a different donor (Donor 2), which also  
336 matched at 4 HLA alleles, including HLA-C, DRB1 and DRB5 (Supplementary dataset 8). After 96 hours  
337 of co-culture with TSA-T, MB002 cells were reduced to 7% of the original population, compared to 57%

338 in the wells cultured with non-specific T cells (NST) derived from the same donor (Supplementary Fig. 17a  
339 and 17b). Thus, in two independent experiments, evaluating TSA-T products derived from two different  
340 donors, the specific cytotoxic capacity of the peptide-primed TSA-T was observed, which outperformed  
341 that of a non-specific, potentially allogeneic response induced by NST.

## 342 DISCUSSION

343 Current chemoradiotherapy treatments for malignant pediatric brain tumors suffer from insufficient  
344 efficacy coupled with significant lifelong sequelae for survivors<sup>36</sup>. Both constitute failures for which  
345 innovative solutions need to be envisioned. T cell-based therapies represent a class of interventions with  
346 attributes suited to the treatment of brain tumors. T cells efficiently penetrate the blood brain barrier, one  
347 of the main challenges for drug development<sup>37-39</sup>. They can home to areas of disease to eliminate small  
348 amounts of residual tumor. And unlike conventional therapies, T cells possess an exquisite ability to  
349 distinguish tumors from normal cells, thus eliminating a primary source of toxicity<sup>3,40</sup>. However, T cell  
350 therapies also have several challenges to be overcome before they can become a standard of care. Solid  
351 tumors create an immunosuppressive microenvironment characterized by exhaustion-inducing checkpoint  
352 molecules, anti-inflammatory cytokines and inhibitors of T cell migration<sup>8</sup>. In addition, the tumor cells  
353 themselves can downregulate MHC expression to limit antigen presentation, as well as downregulate the  
354 expression of antigens in order to escape immunosurveillance. Combinatorial immunotherapy approaches  
355 will be required to overcome these obstacles.

356 In considering immunoadjuvant therapies designed to magnify T cell responses, it is important to  
357 think about why these systems evolved in the first place. An activated immune system is a dual-edged  
358 sword with a fine balance to be maintained: too little and the host is unprotected from infection or invasion,  
359 while too much activity results in life-threatening inflammation. Further, inappropriate non-specific activity  
360 causes autoimmune disease. Immunoadjuvants are relatively blunt tools and thus their application does not  
361 represent an increase of the therapeutic index but rather an amplification of the cellular response, for both  
362 good and ill. Therefore, the burden of specificity lies with the T cell backbone to which these magnifiers  
363 will be applied.

364 Particular attributes of T cell therapies will be required to increase efficacy while decreasing off-  
365 target effects. Indeed, improved efficacy itself is a safety feature in that the more effective the T cell  
366 employed, the fewer non-specific immunoadjuvant interventions will be required. First, multi-antigen  
367 targeting will be critical to target all subclones in a heterogeneous tumor, while also making it more difficult  
368 for the tumor cell to down-regulate the targeted antigens<sup>7</sup>. Epitope spreading will be an important feature  
369 of a successful T cell response<sup>41,42</sup>, but the likelihood of it taking place will depend on the magnitude of the  
370 initial immuno-activation and tumor cell lysis. Second, targeting antigens that are completely specific to  
371 the tumor and expressed nowhere else in the body both increases safety and avoids the need to overcome  
372 the central immune tolerance that protects most endogenous proteins<sup>43</sup>. Third, autologous T cell products  
373 can react to antigens presented by all resident HLA alleles, due to the complete HLA match between tumor

374 and T cells from the same host, thus eliminating disparities of access inherent in off-the-shelf HLA-  
375 restricted products such as peptide vaccines. In addition, T cells expanded from an autologous source likely  
376 include cells that have been exposed to the tumor's antigens, although ineffectively, and thus the  
377 manufacturing process can benefit from a memory response to those antigens. In our data, the TSA peptides  
378 identified in primary tumor cells elicited more robust and ubiquitous immunogenicity by ELISpot than  
379 those identified in the cell lines. Explanation for this could include the complete HLA matching and  
380 presence of memory T cell responses in the autologous as opposed to the allogenic settings. Fourth, we  
381 show that the majority of tumor-specific neoantigens are private to an individual tumor, necessitating a  
382 personalized process for neoantigen identification and T cell production. This personalization could also  
383 potentially enhance the specificity of the T cell product.

384 The proteogenomic neoantigen identification workflow presented here represents a refinement over  
385 previously published approaches with an intent to mitigate some of the challenges inherent in T cell therapy  
386 for pediatric brain tumors. The most mature approaches combine elements of 1) affinity capture of MHC  
387 complexes from tumor cells with subsequent LC-MS/MS of bound peptides; 2) searching peptide spectra  
388 against custom peptide databases containing aberrant events (usually mutations) present in tumor genomic  
389 sequencing<sup>44</sup>; and 3) the use of HLA binding affinity prediction algorithms to select and rank potential  
390 neoantigen peptides. Affinity capture of MHC complexes from tumor cells requires a significant amount of  
391 tissue, far more than is available from a typical pediatric brain tumor resection. In contrast, our approach  
392 requires a very low input of tumor tissue, around 10 mg. Further, the limited efficiency of  
393 immunoprecipitation results in very few identified peptides, which hampers the ability to target the multiple  
394 antigens necessary to deal with tumor heterogeneity and antigen escape. Our approach yields an average of  
395 9 peptides per clinical tumor sample and those peptides originating from non-coding sequences can be used  
396 to predict multiple other tumor-specific peptides. Our approach is also not dependent upon the use of HLA  
397 binding prediction algorithms which have been shown to suffer from a high degree of inaccuracy<sup>18</sup>. Rather,  
398 our workflow identifies longer tumor-specific peptide substrates and relies on the native peptide processing  
399 machinery of autologous dendritic cells to present the optimal epitope for T cell selection and expansion.  
400 We make use of custom databases for peptide searches but unlike most preceding efforts, our pipeline  
401 incorporates novel junctions, SNVs and fusion events rather than just the more typical coding mutations.  
402 This is necessary because pediatric brain tumors, and pediatric cancers in general, have among the lowest  
403 mutation rates of all cancers<sup>15</sup>. Indeed, our findings identify novel junctions as the predominant source of  
404 neoantigen peptides in medulloblastoma, a finding that we have also reproduced in pediatric low-grade  
405 glioma and ependymoma (data not shown). Novel junctions have been predicted to be a source of  
406 neoantigens, but this is the first demonstration of their dominance in primary tumor samples<sup>26</sup>. These novel

407 junctions occur in 6 different types (see Methods) with the most common source of novel peptides being  
408 junctions joining 2 non-exon regions (40%). Because some proteomic studies have reported the detection  
409 of peptides from non-coding RNAs and their potential use as neoantigens<sup>45,46</sup>, we investigated to determine  
410 if junctions involving non-coding RNAs could explain a portion of our novel peptides. We found that  
411 approximately 20% of junctions involving non-exon regions originate from non-coding RNA transcripts  
412 found in the Noncodev6 database<sup>47</sup>, linking our findings to previous work.

413 Our data demonstrates specific CD4+-restricted responses. The well-characterized anti-tumor role of CD8+  
414 T cells has long been prioritized for immunotherapy, however the advantages of transferred cytolytic CD4+  
415 T cells to immune activation are receiving more attention<sup>48-50</sup>. Most commercial peptide mixes for  
416 neoantigen adoptive cellular therapy contain 9-mer peptides and are thus optimized for MHC I-presented  
417 CD8+ epitopes. The partial enzymatic digestion strategy in our mass spec workflow is designed to identify  
418 long peptides which, when processed by autologous dendritic cells into immunogenic epitopes, should  
419 increase the selection and expansion of CD4+ cells. Several publications have shown that DCs can  
420 efficiently intake, process, and present long synthetic peptides<sup>51-54</sup>. Our results indicate the ability to engage  
421 CD4+ T cells, particularly for the TSA T cells targeting MB cell line-derived TSAs, which appear to elicit  
422 a preponderance of CD4+-restricted responses. Indeed, the TSA peptides that showed the strongest  
423 activation by ELISpot acted through MHC II.

424 The uniqueness of the majority of the novel tumor peptides we identified indicates that the genomic events  
425 that generate these peptides are unlikely be tumorigenic. We cannot disregard the possibility that some of  
426 these peptides may contribute to tumor formation as very few high frequency driver events have been  
427 identified in medulloblastoma tumors despite intensive genomic study<sup>55,56</sup>. Commonly held driver events  
428 in medulloblastoma occur at a relatively low frequency compared with other cancers, particularly adult  
429 cancers. The DDX31 finding discussed above may be one such event given the multiple ways in which it  
430 can be perturbed – mutation, deletion and now aberrant splicing<sup>30</sup>. Furthermore, the fact that aberrant splice  
431 junctions originate the majority of the tumor specific peptides identified points to the possibility that  
432 deregulation of splicing is playing a significant role in this tumor type as has been described. For example,  
433 recurrent mutations in U1 spliceosomal small nuclear RNAs have been associated with SHH  
434 medulloblastoma and correlated with changes in splicing<sup>57</sup>. It is therefore plausible to postulate that these  
435 unique novel peptides result from a tumor specific characteristic, such as aberrant splicing machinery,  
436 without the specific events themselves playing a role in tumorigenesis (i.e. passenger events).

437 In summary, our workflow identifies a robust number of neoantigens sourced from multiple types of tumor-  
438 specific genomic and transcriptomic events using very low tissue input and employing native immuno-



439 proteasome processing and presentation machinery to select and expand an autologous personalized T cell  
440 therapy. Such a specific, targeted T cell product could make an ideal backbone for the addition of  
441 potentiating immunoadjuvants in patients with high-risk cancers such as relapsed/refractory  
442 medulloblastoma.

## 443 **MATERIALS AND METHODS**

### 444 **Cell lines and antibodies**

445 MB002 and MB004 were gifts from Y.J. Cho (Oregon Health and Science University, Portland, OR, United  
446 States). D556<sup>58</sup> and D283 (D. Bigner, ATCC) cell lines were maintained in Eagle's Minimum Essential  
447 Medium supplemented with 10% fetal bovine serum and 100 U/mL penicillin and streptomycin  
448 (ThermoFisher Scientific). MB002 and MB004 cells were maintained in culture medium with 1:1  
449 DMEM/F12 (Dulbecco's Modified Eagle Medium: Nutrient Mixture F-12) and Neurobasal™-A Medium  
450 supplemented with non-essential amino acids, Sodium Pyruvate, HEPES, GlutaMax, B27, EGF, FGF,  
451 Heparin, LIF, 10% fetal bovine serum (ATCC), and 100 U/mL penicillin and streptomycin (All from  
452 ThermoFisher Scientific). All cell lines were maintained at 37°C with 5% CO<sub>2</sub> in a 95% humidified  
453 atmosphere. All established cell lines were verified with STR analysis (GRCF, Johns Hopkins). Antibodies  
454 used in this study are listed in Supplementary dataset 10.

### 455 **Clinical tumor samples**

456 Medulloblastoma clinical tumor samples are part of the Children's Brain Tumor Network (formerly  
457 CBTTC) study cohort CBTTC\_0015a. Additional samples were sourced from the Children's National  
458 tumor bank. Informed consent of all patients was obtained under a Children's National Medical Center  
459 Institutional Review Board and CBTTC approved protocol. Additional information about clinical samples  
460 can be found in Supplementary dataset 1.

### 461 **DNA/RNA extraction, library preparation and sequencing.**

462 RNA-seq and WES data from tumor samples were provided by CBTN. For the RNA sequencing of the  
463 D556, D283, MB002 and MB004 cell lines, total RNA was extracted from cells using the RNAeasy Mini  
464 Kit (Qiagen) according to the manufacturer's protocol. Strand-specific poly-A selected RNA libraries were  
465 sequenced on Illumina HiSeq platform with 2x150 bp read length to an average of 200M reads per sample  
466 by GENEWIZ. All raw genomic data is available upon access request through the Children's Brain Tumor  
467 Network (<https://cbtn.org/>) and can be accessed through the Gabriella Miller Kids First Portal  
468 (<https://kidsfirstdrc.org/>). Additionally, cell lines RNA-seq reads have been deposited in the Sequence Read  
469 Archive (SRA) with the accession number PRJNA655511.

### 470 **Bioinformatics analysis of WGS data**

471 Somatic variant calling was done following the GATK-Mutect2 best practices<sup>23,59,60</sup>. Briefly, Raw read  
472 sequences were mapped to the GRCh38 reference human genome with bwa<sup>61</sup> and duplicates were marked  
473 with PicardTools (v2.18.1). Indel realignment and base recalibration was done with GATKv3.8.  
474 Recalibrated reads were used for variant calls using Mutectv2 following default settings and a panel of  
475 normal (PON) including the MB germline WGS cohort (Supplementary dataset 1). For tumors with no  
476 available germline WGS, the Mutectv2 tumor-only mode was used. Only variants on coding sequences  
477 were called.

#### 478 **Bioinformatic analysis of RNA-seq data**

479 RNA-seq raw reads were mapped to the human reference genome GRCh38 using STAR (v.2.5.1)<sup>62</sup> with 2-  
480 pass alignment mode to get better alignment around novel splice junctions and Ensembl release 84  
481 annotations (Homo\_sapiens.GRCh38.84.gtf). In the case of D556, D283, MB002 and MB004 cell lines,  
482 RNA-seq reads were used for variant calls following the GATK best practices for RNA-seq. Briefly, RNA-  
483 seq were aligned to the genome using the 2-pass alignment mode of STAR (v.2.5.1). Next, duplicated reads  
484 were marked with MarkDuplicates tool (PicardTools). Then, we used the SplitNCigarReads and  
485 IndelRealigner tools from GATKv3.8<sup>23,59,60</sup> to split RNA-seq reads and realign reads around indels. Finally,  
486 variants were called using HaplotypeCaller tool (GATKv3.8) and filtered using the VariantFiltration tool  
487 (GATK v3.8) with the -window 35 and -cluster 3 options, and Fisher Strand values (FS > 30.0) and Qual  
488 by Depth values (QD < 2.0).

#### 489 **Gene Fusion calling**

490 Gene fusions were called using the following software: Defuse<sup>22</sup>, ericscript<sup>21</sup> and STAR-Fusion<sup>20</sup>. Default  
491 settings were used in all cases.

#### 492 **Database generation**

493 Tumor-specific databases using single nucleotide variations and small insertions/deletions (SNVs), fusions  
494 and novel isoform variants were generated for each tumor and cell line. *Creation of Variant Peptide*  
495 *Database:* We used the R package CustomProDB<sup>63</sup> to generate variant peptides resulting from DNA SNVs.  
496 Coding Mutect2 calls that passed all the filters were incorporated into the genomic sequences and translated  
497 to proteins using the Ensembl release 84 transcript annotations. *Creation of Novel Junction Peptide*  
498 *database:* To generate protein databases from novel splice junctions, we used the R package  
499 CustomProDB<sup>63</sup>. This package uses as input a bed12 file with each junction found in the RNA-seq  
500 alignment bam file. The junction BED files were derived from RNA-seq alignments using the “junctions

501 extract” function of regtools<sup>64</sup>. This bed12 file contains the chromosome number, the start and end position  
502 of the junction and the block size of each exon; block sizes are calculated based in the longest read spliced,  
503 the standard format for a bed12 file. Then, CustomProDB removes any junction that is annotated in the  
504 reference annotation transcript file (ENSEMBL release 84 transcript annotation gtf file) and classifies the  
505 junctions into 6 types of novel splice junction: 1) junctions that connect two known exons, with two  
506 subtypes: a) novel alternative splicing junction where the exons belong to the same gene or b) fusion, where  
507 the exons belong to different genes, 2) junctions that connect a known exon and a region that overlaps with  
508 a known exon, 3) junctions that connect a known exon and a non-exon region, 4) junctions that connect  
509 two regions overlapping known exons, 5) junction that connect a region overlapping a known exon and a  
510 non-exon region, and 6) junctions that connect two non-exon regions. The non-exon regions could be  
511 anywhere, e.g. in intronic regions of the same gene, intronic regions of different genes or intergenic regions.  
512 Finally, each putative novel junction is translated in 3frames using the block size information in the bed  
513 file. As an expression cut off, we required at least 5 reads spanning splice junctions; novel junctions with  
514 less than 5 reads were not included in the database. *Creation of Fusion Peptide database.* Fusion breakpoint  
515 coordinates were extracted from the fusion callers and the resulting fused DNA sequences were translated  
516 in 6-frames. Stop to stop protein coding regions with more than 6 consecutive amino acids were included  
517 in the database. Finally, tumor SNVs, novel junctions and fusion peptides were merged together with human  
518 UniProt proteome (UP000005640). The databases generated contain an average of 259,048 entries, 100,179  
519 of them corresponding to the human UniProt proteome database. The average ORF of the databases is 175.8  
520 amino acids (including human UniProt proteome), the average ORF of each of the event types were 21.9,  
521 47.7 and 959 amino acids for fusions, novel junctions and SNV, respectively. Detailed information for each  
522 tumor database can be found in Supplementary dataset 2.

### 523 **LC-MS analysis of peptides**

524 The tumor cells were lysed in RIPA buffer (Pierce) by homogenization followed by sonication. The lysate  
525 was centrifuged at 14,000 rpm for 30 minutes at 4°C, and the cleared supernatant collected. The protein  
526 concentration was determined by BCA assay (Pierce) and 100 µg of total protein lysate was processed for  
527 each sample. The proteins were extracted with methanol:chloroform, air dried and dissolved in 8M urea  
528 followed by dilution to 2M concentration, and digested with sequencing grade LysC enzyme (Thermo  
529 Scientific) for 4 hours at 37°C or Trypsin overnight at 37°C. The resulting peptides were desalted and  
530 fractionated into 8 fractions using the high-pH fractionation kit (Pierce). The peptide mixtures from each  
531 fraction were sequentially analyzed by LC-MS/MS using the nano-LC system (Easy nLC1000) connected  
532 to a Q Exactive HF mass spectrometer (Thermo Scientific). The platform is configured with a nano-  
533 electrospray ion source (Easy-Spray, Thermo Scientific), Acclaim PepMap 100 C18 nanoViper trap column

534 (3  $\mu\text{m}$  particle size, 75  $\mu\text{m}$  ID x 20 mm length), and EASY-Spray C18 analytical column (2  $\mu\text{m}$  particle  
535 size, 75  $\mu\text{m}$  ID x 500 mm length). The peptides were eluted at a flow rate of 300 nL/min using linear  
536 gradients of 7-25 % Acetonitrile (in aqueous phase and 0.1% Formic Acid) for 80 minutes, followed by  
537 45% Acetonitrile for 25 minutes, and static flow at 90% Acetonitrile for 15 minutes. All raw proteomic  
538 data is available upon access request through the Children's Brain Tumor Tissue Consortium  
539 (<https://cbttc.org/>).

#### 540 **Mass spectrometry data analysis**

541 The LC-MS/MS data were collected in data-dependent mode switching between one full scan MS mode  
542 (m/z 380-1400, resolution 60K, AGC 3e6, max ion time 20 ms), and 10 MS/MS scans (resolution 15K,  
543 AGC 1e5, max ion time 120 ms, nCE 27) of the top 10 target ions. The ions were sequenced once and then  
544 dynamically excluded from the list for 30 seconds. The MS raw data sets were analyzed using Thermo  
545 Proteome Discoverer Software (version 2.3). The spectrum files were recalibrated using Trypsin or LysC  
546 digested indexed Human UniProt database, and peptide spectrums were searched against a tumor-specific  
547 custom database using the Sequest HT algorithm at precursor mass tolerance of 10 ppm, and fragment mass  
548 tolerance of 0.02 Da. Methionine oxidation and N-terminus acetylation were specified as dynamic  
549 modifications. For each tumor a fully- and a partially- digested search was performed. Peptides and proteins  
550 were filtered using a Percolator at a target FDR of 0.01 and a Xcorr > 1.

#### 551 **Peptide filtering**

552 A highly stringent filtering strategy was developed in order to filter out previously annotated and  
553 unannotated but normal peptides (Figure S1). This strategy was divided into 2 steps. (i) To identify  
554 previously annotated peptides, we used the BLASTP tool<sup>25</sup> to remove tumor-specific peptides that matched  
555 any of the following protein databases: UniProtKB/Swiss-Prot including isoforms, NCBI human non-  
556 redundant sequences (including all non-redundant GenBank CDS translations, PDB, SwissProt, PIR and  
557 PRF excluding environmental samples from WGS projects) and neXtProt. (ii) To identify unannotated  
558 normal peptides, we used 2 different approaches, one based on proteomics and another based on genomics.  
559 First, we performed proteomic profiling of 5 healthy childhood cerebellum samples using the same methods  
560 as the tumor samples. These proteomic raw files were searched against the tumor-specific databases and  
561 each novel/non-annotated peptide identified both in the normal cerebellum and in the tumor tissue was  
562 removed, leaving only novel peptides identified exclusively in the tumor tissue. Second, for each novel  
563 peptide identified from fusion or junction events, we evaluated if the fusion or junction events were also  
564 detected in a collection of related tissue RNA-seq files from the Genotype-Tissue Expression (GTEx)

565 Project (Supplementary dataset 1). For fusion events, the exact breakpoint genomic coordinates in each arm  
566 were compared. For example, if we detected a peptide arising from a fusion event with the breakpoint  
567 coordinates chr1:15,908,861 and chr5:38,702,49, and if the same breakpoints were detected in any of the  
568 GTEx normal tissues analyzed, this peptide was removed. Similarly, for junctions, exact genomic  
569 coordinates were compared. For example, a peptide arising from a junction with coordinates  
570 chr9:132618441-132642004 would be removed if the same junction is detected in any of the GTEx tissues  
571 used. The GTEx data used for the analyses described in this manuscript were obtained from dbGaP  
572 accession number phs000424.v2.p1.

### 573 **Peptide hydrophobicity index prediction.**

574 Peptide sequence specific hydrophobicity index (HI) was calculated with the SSRCalc vQ tool<sup>27</sup>. The  
575 parameters were set to 100Å C18 column, 0.1% Formic Acid separation system and only unmodified  
576 peptides were included. Observed retention times were collected from Proteome Discoverer PSM files. If  
577 a peptide was detected multiple times (multiple psm) the average retention time was used. Retention times  
578 were plotted against the predicted HI and fitted to a linear model using the R function “lm”. R squared and  
579 p-value was calculated using the same “lm” function.

### 580 **Retention time prediction**

581 Retention times were predicted using the deep learning algorithm AutoRT<sup>28</sup>. A training model (MB model)  
582 was created with all non-modified peptides detected in the cohort using AutoRT default settings. For  
583 peptides identified multiple times, an average retention time (RT) was calculated. RT was predicted for  
584 4000 random normal UniProt matched peptides and for all tumor specific peptides identified in the 46 MB  
585 tissues. Alternatively, the model used as example in the AutoRT publication (model PXD006109, using  
586 peptides data from the PXD006109 dataset<sup>29</sup>) was used to calculate RT for a subset of normal peptides  
587 matched to UniProt or for all tumor specific peptides in the 46 MB tumors. Experimental retention times  
588 were plotted against the predicted retention times and fitted to a linear model using the R function “lm”. R  
589 squared and p-value was calculated using the same “lm” function.

### 590 **Synthetic peptides**

591 Peptides for spectra validation and T cell stimulation were synthesized by GenScript with >98% purity and  
592 TFA removal.

593 A common approach to the manufacture of antigen specific T cells is to identify open reading frames  
594 (ORFs), either novel or annotated, and then generate iterative overlapping peptides attempting to find

595 antigenic peptide sequences that will bind to the MHC complex in the context of a particular patient's HLA  
596 type. This is advantageous where the same peptide mixture can be used "off the shelf" to manufacture a T  
597 cell product for every patient irrespective of their HLA type<sup>34</sup>. However, in order to target a personalized  
598 unique antigen set with complete HLA specificity, our approach is to instead identify longer peptides and  
599 rely upon autologous antigen presenting cells to process them into the proper length and sequence to bind  
600 MHC I and II molecules in the proper HLA context. Such protocols using DCs pulsed with overlapping  
601 peptide pools (15mers overlapping by 11 amino acids) have been used for the manufacture of tumor  
602 associated antigen (TAA) specific T cells that have been used clinically to treat patients with solid tumors<sup>34</sup>.  
603 Long synthetic peptides are rapidly and much more efficiently processed by DCs, resulting in an increased  
604 presentation to CD4<sup>+</sup> and CD8<sup>+</sup> T cells. Long synthetic peptides are detected very rapidly in an  
605 endolysosome-independent manner after internalization by DCs, followed by proteasome processing,  
606 transport and Ag processing-dependent MHC class I and Class II presentation<sup>51-54</sup>.

#### 607 **Generation of Antigen Presenting Cells**

608 Dendritic cells (DC) and peripheral blood mononuclear cells (PBMC) from partially HLA-matched healthy  
609 donors were derived from 30-40 mL sodium heparin anti-coagulated blood from local donors, commercially  
610 available cryopreserved PBMCs (Stemcell Technologies, Vancouver, Canada) and patient 7316-3778.  
611 PBMCs were purified on day 0 by Ficoll density gradient centrifugation (SepMate, Stemcell Technologies,  
612 Vancouver, Canada) according to the manufacturer's protocol. Red blood cells were lysed in ACK buffer  
613 and PBMCs incubated at 37°C, 5% CO<sub>2</sub> (6 well plate, 4 mL DC medium, 10-15e6/well). After 2 hours, the  
614 non-adherent fraction was removed by gentle flushing followed by two rinses with PBS to remove  
615 lymphocytes. The adherent fraction was cultured in DC medium (CellGenix® GMP DC Medium + 1% L-  
616 Glutamine (200 mM) + IL-4 (1000 U/mL; R&D) and GM-CSF (800 U/mL; R&D). The non-adherent cells  
617 (NAC) were cryopreserved in freezing medium (50% RPMI-1640, 40% FBS, 10% DMSO). Differentiating  
618 monocytes/DCs were fed on day 3 or day 4 by half medium removal and replacement with fresh DC  
619 medium + IL-4 and GM-CSF; cytokines at 2X concentration to account for final volume. On day 7,  
620 immature DCs were harvested and incubated with cell line/tumor-specific peptides that had been  
621 resuspended at 10 µg/ml in DC medium containing IL-4 and GM-CSF. DCs were resuspended in 100 µL  
622 of peptide solution in a 15 mL tube with a loose lid (37°C, 5% CO<sub>2</sub>). After 4-6 hours, 2.5 mL DC maturation  
623 medium was added (CellGenix® GMP DC Medium + L-Glut) + IL-4 + GM-CSF + IL-1β (10 ng/ml) + IL-  
624 6 (10 ng/ml) + TNF-α (10 ng/ml) + LPS (30 ng/mL) and DCs were transferred to a 24 well plate for 16-18  
625 hours (37°C, 5% CO<sub>2</sub>).

#### 626 **Generation of PHA Blasts**

627 For phytohemagglutinin (PHA) blast generation, PBMC or NAC were stimulated with 5 mg/mL of the  
628 mitogen PHA (Sigma-Aldrich) to promote blast formation (PHA blasts). PHA blasts were initially cultured  
629 in RPMI-1640 supplemented with 5% human serum (Valley Biomedical, Inc), 2 mmol/L Gluta-Max. Every  
630 1-3 days, PHA blasts were split 1 in 2 and/or fed with medium containing IL-2 (100 U/mL; R&D).

### 631 **Induction of de novo T cell response in vitro**

632 At a maximum of 16-18 hours following maturation, peptide-loaded DCs were irradiated (25 Gy) and co-  
633 cultured with non-adherent cells at a ratio of 1:10 in 24-well plates (1e5 DC: 1e6 NAC). T cell medium for  
634 stimulation 1 comprised RPMI-1640 (60%) + Click's Medium (40%) + Human serum (10%) + GlutaMax  
635 (1%) + IL-6 (100 ng/mL) + IL-7 (10 ng/mL) + IL-12 (10 ng/mL) + IL-15 (5 ng/mL). Cells were fed with  
636 complete RPMI-1640 (no cytokines) on day 3 and day 6 if required based on medium color and cell density.  
637 On day 6, a fresh batch of DCs was peptide loaded, matured overnight and used to restimulate the  
638 proliferating cells on day 7. Stimulation 2 medium contained IL-7 (10 ng/mL) and IL-2 (100 U/mL).  
639 Restimulation with DCs was repeated on day 14 with medium containing IL-2 only. On day 21, expanded  
640 cells were harvested and used for ELISpot assays and flow cytometric analysis. Cells used for cytotoxicity  
641 assays were either plated fresh or following overnight rest after cryopreservation. Cells used for TCR  
642 sequencing were cryopreserved.

### 643 **Anti-IFN- $\gamma$ Enzyme-Linked Immuno-spot (ELISpot) Assay**

644 Peptide recognition by expanded cells was assessed by anti-IFN- $\gamma$  ELISpot. Multi-Screen HTS filter plate  
645 membranes (Millipore) were activated with 70% EtOH, washed with PBS, coated with IFN- $\gamma$  capture  
646 antibody (10 mg/mL; Mabtech) and incubated overnight at 4°C. The next day plates were washed with PBS  
647 and blocked with T cell medium for 1 hour at 37°C to control for non-specific protein binding. Expanded  
648 cells were washed, resuspended at 1e6 cells/mL in T cell medium and 5e4-1e5 cells added to appropriate  
649 wells, in the presence or absence of peptide-loaded DCs as appropriate. Pooled or single peptides (100  $\mu$ L;  
650 0.2 mg/mL) were added to appropriate wells along with actin (100  $\mu$ L; 0.2 mg/mL; irrelevant peptide  
651 control) and Staphylococcal enterotoxin B (SEB; positive control). Plates were incubated for 24 hours at  
652 37°C. Plates were developed by washing 6 times in PBS/0.05%Tween 20 followed by incubation with  
653 biotinylated IFN- $\gamma$  detection antibody (0.5 mg/mL; Mabtech; 2 hours, 37°C). This was followed by a further  
654 6 washes in PBS/0.05%Tween 20 and incubation with avidin DH-coupled biotinylated peroxidase H  
655 complex (Vectastain Elite ABC Kit; Vector Laboratories) for 1 hour in the dark at room temperature (RT).  
656 Following 3 washes in PBST and 3 washes in PBS, spot formation was detected by incubation with 3-  
657 Amino-9-Ethylcarbazole (AEC) substrate for 4 minutes in the dark. Spot-forming units (SFU) were counted



658 and evaluated by Zellnet Consulting using an automated plate reader system (Zeiss). Recognition of pooled  
659 neoantigen peptides and individual peptides was compared against no peptide and actin. In the absence of  
660 antigen-presenting cells (APC) a positive T cell response was defined as a minimum of 5 SFU and a fold  
661 increase of  $\geq 2.5$  over actin. In the presence of APCs, due to increased background, a more stringent positive  
662 response was defined as a fold increase of  $\geq 2$  over actin or T cell+APC, whichever was higher.

### 663 **HLA-blocking experiments**

664 HLA-restriction of antigen recognition was tested in anti-IFN- $\gamma$  ELISpot using autologous DCs loaded with  
665 the relevant peptide or without peptide (negative control) and blocking antibodies against HLA class I and  
666 II (both Dako). DCs were incubated with peptides overnight and the next day anti-HLA mABs were added  
667 to ELISpot plates for 1 hour prior to the addition of expanded cells at a ratio of 1 DC to 50 expanded cells.  
668 ELISpot plates were incubated and developed as described above.

### 669 **T cell phenotyping by flow cytometry**

670 Freshly harvested expanded cells were washed with PBS, FcR blocked and stained for viability  
671 (LIVE/DEAD™ Fixable Aqua Dead Cell Stain Kit, ThermoFisher Scientific, MA, USA). Cell surface  
672 molecules were labeled with optimally titrated mABs, then cells were fixed (Cytifix, BD Biosciences),  
673 permeabilized (Perm Wash, BD Biosciences) and labeled with mABs against intracellular targets according  
674 to manufacturer's instructions. Cell populations were defined as follows: T central memory (TCM): CD3+  
675 CD4/8+CD45RO+CCR7+CD62L+/-; T effector memory (TEM): CD3+CD4/8+CD45RO+ CCR7-CD62L-  
676 ; T effector (TEFF): CD3+CD4/8+CD45RO-CCR7-CD62L-; putative natural killer cell (NK): CD3-  
677 CD56+ CD16+/-; putative natural killer T cell (NKT): CD3+CD56+; T stem cell memory (TSCM):  
678 CD3+CD4/8+CD45RO-CCR7+CD62L+CD95+CD127+. Acquisition was performed on a Beckman Coulter  
679 CytoFlex S using CytExpert version 2.2.0.97 software. Analysis was performed using FlowJo v10.5.

680 The gating tree for detecting CD3+CD4+CD8+TCR $\gamma\delta$ +, T<sub>REGS</sub>, NK and NKT cells in a single panel was as  
681 follows (Figure S10A): 1. Time/FSH (events collected during stable Flow and excludes debris). 2. FSC/SSC  
682 (cell distribution light scatter based on size and intracellular composition, respectively) 3. FSC- height/FSC-  
683 area (pulse geometry allows exclusion of events that fall outside single cell range) 4. Live/Dead Aqua/CD3+  
684 (identifies T cells, putative NK cells and live cells). 5. CD4-BV605/CD8-BV421 (identified  
685 CD4+CD8+CD4-CD8-). 6. Gamma delta T cells were classified as CD3+CD4-CD8-TCR $\gamma\delta$ +CD56+/- 7.  
686 CD4+ cells were further interrogated by bivariate examination of CD25 and CD127 to identify putative  
687 T<sub>REGS</sub>, classified as CD3+CD4+CD25+CD127dim. 8. Putative NKT cells were classified simply as  
688 CD3+CD56+ and CD8+ T cells were classified as CD3+CD8+CD56-. 9. Putative NK cells were classified

689 as CD3-CD56+CD16+/- . The gating tree for detecting T central memory (TCM), T effector memory  
690 (TEM), T effector (TEFF) & T stem cell memory (TSCM) cells in a single panel was as follows (Figure  
691 S10B): 1-5 identical to S10A. Antigen-experienced cells (CD4+/8+CD45RO+) were further assessed as  
692 TCM (CD62L+CCR+/- or TEM (CD62L-CCR7- . (Antigen-inexperienced cells (CD45RO-) were further  
693 interrogated for TEFF (CD62L-CCR7-) and TSCM (CD62L+CCR7+CD95+CD127+) status. Where > 10%  
694 of events fell on an axis bi-exponential scaling was used to visualize all cells on the plot.

#### 695 **Analysis of IFN- $\gamma$ and TNF- $\alpha$ release by flow cytometry**

696 Freshly harvested expanded cells were incubated with pooled medulloblastoma cell line/tumor-specific  
697 peptides (2 ng/ $\mu$ L; 100  $\mu$ L/well) and anti-CD28/CD49 (5  $\mu$ L/well); (FastImmune, BD Biosciences, CA,  
698 USA). Unstimulated cells (anti-CD28/CD49 only), and actin-stimulated (anti-CD28/CD49 + actin 200  
699 ng/well) cells served as negative and irrelevant antigen controls. After 2 hours (37°C, 5% CO<sub>2</sub>), the protein  
700 transport inhibitor Brefeldin A (Golgi Plug, BD Biosciences, CA, USA) was added to inhibit cytokine  
701 release from the cells. Cells were incubated for a further 4 hours, then washed with PBS, FcR blocked and  
702 stained for viability (LIVE/DEAD™ Fixable Aqua Dead Cell Stain Kit, ThermoFisher Scientific, MA,  
703 USA). Cell surface molecules were labeled with optimally titrated mABs, fixed (Cytofix, BD Biosciences),  
704 permeabilized (Perm Wash, BD Biosciences) and labeled with mABs against intracellular targets according  
705 to manufacturer's instructions. Acquisition was performed on a Beckman Coulter CytoFlex S using  
706 CytExpert version 2.2.0.97 software. Analysis was performed using FlowJo v10.5.

#### 707 **Cytotoxicity Assay**

708 Cryopreserved, expanded cells were quickly thawed in a 37°C water bath, immediately transferred to 10  
709 ml 37°C RPMI-1640 medium and centrifuged (RT, 400g, 5 minutes) to remove DMSO from the cell  
710 suspension. The cell pellet was resuspended in T cell medium and counted using a Luna dual fluorescence  
711 automated cell counter (Logos Biosystems). Cells were rested overnight in T cell medium + IL-2 (100  
712 U/mL) at 37°C+5% CO<sub>2</sub>. Target medulloblastoma tumor cells were switched to T cell medium (no IL-2)  
713 for 96 hours prior to commencement of co-culture with T cells to allow tumor cells to acclimatise to T cell  
714 medium. This reduced spontaneous tumor cell death at the 24-hour time that resulted from the change of  
715 medium. PHA blasts were used fresh following the 7-day generation.

716 On the day of co-culture initiation target tumor cells and were stained with Cell Trace Violet (ThermoFisher  
717 Scientific) cell labeling dye as follows. Working in a hood with the light off, a 5 mM stock solution of  
718 CellTrace™ was prepared immediately prior to use according to manufacturer's instructions. Target cells  
719 were resuspended at 1e6 cells/mL in PBS (no FBS). CellTrace™ solution was added (1  $\mu$ L/mL) for a final

720 working solution of 5  $\mu$ M. Cells were briefly vortexed to ensure even staining and incubated for 20 minutes  
721 at 37°C, protected from light. Following incubation, culture medium (5 X the staining volume) containing  
722 at least 1% human serum was added and cells incubated for 5 minutes to remove any free dye remaining in  
723 the solution. Cells were pelleted by centrifugation, resuspended at 1e6 cells/mL in fresh pre-warmed  
724 medium, and incubated for at least 10 minutes to allow cells to undergo acetate hydrolysis before  
725 proceeding with co-culture.

726 While tumor targets were incubating, expanded T cells were pelleted, counted and resuspended at 1e6  
727 cells/mL in medium+IL-2. T cells were dispensed in triplicate into 4 X 96-well U-bottom plates (D0, 48,  
728 and 96 hours) in ratio target:TSA-T 1:10.

729 Following staining, 1e4 target cells were added to the appropriate wells and medium added for a final  
730 volume of 200  $\mu$ L. Targets only were plated as a background viability control. T cell, tumor cell and blast-  
731 only wells were plated for unstained and single stain controls for the viability Cell Trace dyes. OneComp  
732 eBeads (Invitrogen) were used for single stain controls for anti-CD3 BV785 (BioLegend; Clone: OKT4).

733 As soon as possible after plating (D0), and at 48 and 96 hours, co-cultures were stained and fixed as follows.  
734 For D556 cells, to halt activation and detach adherent cells, 20  $\mu$ L/well of 20 mM EDTA in PBS was added,  
735 mixed by pipetting, incubated for 15 min at room temperature, then mixed again by pipetting to resuspend  
736 adhered cells fully. Plates were centrifuged (RT, 400g, 4 minutes), supernatants aspirated and 5  $\mu$ L FcR  
737 block (Miltenyi; Fc Receptor Blocking Reagent human; 130-059-901) added to cells in residual liquid for  
738 5 minutes to control against non-specific binding. Without washing 100  $\mu$ L Fixable Live Dead Green  
739 viability dye (1/1000; ThermoFisher Scientific) was added and the cells incubated for 15 minutes at RT in  
740 the dark. Cells were washed once by adding 100  $\mu$ L FACS Buffer (PBS + 0.5% FBS) and centrifuging (RT,  
741 400g, 4 minutes). After aspiration, cells were gently pipetted to resuspend the pellet and 50  $\mu$ L of pre-  
742 prepared antibody cocktails added to the residual liquid (1 minute, RT, in the dark). FACS Buffer (50  $\mu$ L)  
743 was added to unstained cells. Following AB labeling, cells were washed once by the addition of 100  $\mu$ L  
744 FACS Buffer and centrifugation (RT, 400g, 4 minutes). Cells were fixed by adding 100  $\mu$ L 4%  
745 paraformaldehyde to the residual liquid, incubating at 4°C for 15 minutes and washed by addition of 100  
746  $\mu$ L FACS Buffer followed by centrifugation (RT, 400g, 4 minutes). Cells were resuspended in 100  $\mu$ L  
747 FACS Buffer, the plates sealed, foil-wrapped and stored at 4°C until acquisition.

#### 748 **Flow cytometry acquisition and data analysis**

749 Flow cytometry acquisition was performed on a CytoFlex S (Beckman Coulter) equipped with 405 nm, 488  
750 nm, 561 nm and 638 nm lasers and calibrated weekly. The instrument was set to acquire a minimum of  
751 50,000 single, live CD3+ cells on a low flow rate. The time parameter was included to detect fluidics issues  
752 during sample acquisition and doublets were excluded using fluorescence peak integral versus height.

753 Spectral overlap was compensated for using beads labeled with the same mAB used in the panel (OneComp  
754 Beads, eBioscience), CellTrace-labeled cells (in cytotoxicity assays) and dead cells (viability dye). Post-  
755 acquisition compensation was applied and samples analyzed following application of flow stability, pulse  
756 geometry and viability gates to exclude debris, doublets and dead cells prior to analysis of cells of interest.  
757 Unstained cells, single-stain positive controls and fluorescence minus one (FMO) controls were used to  
758 determine background auto-fluorescence and set positive and negative gates. Data were analyzed using  
759 FlowJo version 10 analysis software (BD Biosciences, Ashland, OR). To determine specific T cell cytokine  
760 responses, all samples were compared to the respective controls and percent positive and/or fold change  
761 (FC) was calculated. In samples with low numbers of positive events, a positive response was defined as a  
762 fold change  $\geq 10$ . The gating strategy and sample dot plots are shown in Supplementary Figures S14 (ICS;  
763 function), S15A (cell populations/phenotype), S15B (differentiation status) and S17 (cytotoxicity).

#### 764 **Immunosequencing**

765 RNA was extracted from peptide-stimulated T cells, using an RNA Easy mini kit, (Qiagen). TCR V $\beta$  CDR3  
766 sequencing was performed by Adaptive Biotechnologies using the survey level resolution Immunoseq  
767 platforms (Adaptive Biotechnologies, Seattle, WA). Analysis and compilation of sequence results was  
768 performed on Adaptive software.  
769

770 **DATA VALILABILITY.**

771 RNA-seq and WGS reads from medulloblastoma tumors are available upon access request through the  
772 Children's Brain Tumor Network (<https://cbtn.org/>) and can be accessed through the Gabriella Miller  
773 Kids First Portal (<https://kidsfirstdrc.org/>). Proteomic raw spectra files, databases and identified peptides  
774 are available upon access request through the Children's Brain Tumor Network (<https://cbtn.org/>).  
775 Additionally, cell line RNA-seq reads have been deposited in the Sequence Read Archive (SRA) with the  
776 accession number PRJNA655511.

777 **ACKNOWLEDGEMENTS**

778 The Genotype-Tissue Expression (GTEx) Project was supported by the Common Fund of the Office of the  
779 Director of the National Institutes of Health, and by NCI, NHGRI, NHLBI, NIDA, NIMH, and NINDS.  
780 This research was conducted using data (WGS and RNA-seq) and tumor specimens made available by The  
781 Children's Brain Tumor Network (CBTN). Funding for these experiments was provided by the Chance for  
782 Life foundation, The Children's Cancer Foundation, The Jeff Gordon Children's Foundation, The  
783 Children's Brain Tumor Foundation, and the Lilabeau Foundation.

784

785 **REFERENCES**

- 786 1 Shih, D. J. *et al.* Cytogenetic prognostication within medulloblastoma subgroups. *Journal of*  
787 *clinical oncology : official journal of the American Society of Clinical Oncology* **32**, 886-896,  
788 doi:10.1200/JCO.2013.50.9539 (2014).
- 789 2 Agudo, J. *et al.* GFP-specific CD8 T cells enable targeted cell depletion and visualization of T-  
790 cell interactions. *Nature biotechnology* **33**, 1287-1292, doi:10.1038/nbt.3386 (2015).
- 791 3 Mount, C. W. *et al.* Potent antitumor efficacy of anti-GD2 CAR T cells in H3-K27M(+) diffuse  
792 midline gliomas. *Nat Med* **24**, 572-579, doi:10.1038/s41591-018-0006-x (2018).
- 793 4 Heslop, H. E. *et al.* Long-term outcome of EBV-specific T-cell infusions to prevent or treat EBV-  
794 related lymphoproliferative disease in transplant recipients. *Blood* **115**, 925-935,  
795 doi:10.1182/blood-2009-08-239186 (2010).
- 796 5 Gerdemann, U. *et al.* Cytotoxic T lymphocytes simultaneously targeting multiple tumor-  
797 associated antigens to treat EBV negative lymphoma. *Mol Ther* **19**, 2258-2268,  
798 doi:10.1038/mt.2011.167 (2011).
- 799 6 Weber, G. *et al.* Generation of tumor antigen-specific T cell lines from pediatric patients with  
800 acute lymphoblastic leukemia--implications for immunotherapy. *Clinical cancer research : an*  
801 *official journal of the American Association for Cancer Research* **19**, 5079-5091,  
802 doi:10.1158/1078-0432.CCR-13-0955 (2013).
- 803 7 Chowell, D. *et al.* Patient HLA class I genotype influences cancer response to checkpoint  
804 blockade immunotherapy. *Science* **359**, 582-587, doi:10.1126/science.aao4572 (2018).
- 805 8 Kvistborg, P. & Yewdell, J. W. Enhancing responses to cancer immunotherapy. *Science* **359**,  
806 516-517, doi:10.1126/science.aar6574 (2018).
- 807 9 Fratta, E. *et al.* The biology of cancer testis antigens: putative function, regulation and therapeutic  
808 potential. *Molecular oncology* **5**, 164-182, doi:10.1016/j.molonc.2011.02.001 (2011).
- 809 10 Lee, M. H. *et al.* Expression of cancer-testis genes in brain tumors. *Journal of Korean*  
810 *Neurosurgical Society* **43**, 190-193, doi:10.3340/jkns.2008.43.4.190 (2008).
- 811 11 Lee, P. P. *et al.* Characterization of circulating T cells specific for tumor-associated antigens in  
812 melanoma patients. *Nat Med* **5**, 677-685, doi:10.1038/9525 (1999).
- 813 12 Manzo, T., Heslop, H. E. & Rooney, C. M. Antigen-specific T cell therapies for cancer. *Hum Mol*  
814 *Genet* **24**, R67-73, doi:10.1093/hmg/ddv270 (2015).
- 815 13 Mohme, M. & Neidert, M. C. Tumor-Specific T Cell Activation in Malignant Brain Tumors.  
816 *Front Immunol* **11**, 205, doi:10.3389/fimmu.2020.00205 (2020).
- 817 14 Warren, E. H. *et al.* Therapy of relapsed leukemia after allogeneic hematopoietic cell  
818 transplantation with T cells specific for minor histocompatibility antigens. *Blood* **115**, 3869-3878,  
819 doi:10.1182/blood-2009-10-248997 (2010).
- 820 15 Grobner, S. N. *et al.* The landscape of genomic alterations across childhood cancers. *Nature* **555**,  
821 321-327, doi:10.1038/nature25480 (2018).
- 822 16 Blaesche, F. *et al.* Low mutational load in pediatric medulloblastoma still translates into  
823 neoantigens as targets for specific T-cell immunotherapy. *Cytotherapy* **21**, 973-986,  
824 doi:10.1016/j.jcyt.2019.06.009 (2019).
- 825 17 Hu, Z., Ott, P. A. & Wu, C. J. Towards personalized, tumour-specific, therapeutic vaccines for  
826 cancer. *Nat Rev Immunol* **18**, 168-182, doi:10.1038/nri.2017.131 (2018).
- 827 18 Bassani-Sternberg, M. *et al.* Direct identification of clinically relevant neoepitopes presented on  
828 native human melanoma tissue by mass spectrometry. *Nat Commun* **7**, 13404,  
829 doi:10.1038/ncomms13404 (2016).
- 830 19 Zhao, W. & Sher, X. Systematically benchmarking peptide-MHC binding predictors: From  
831 synthetic to naturally processed epitopes. *PLoS computational biology* **14**, e1006457,  
832 doi:10.1371/journal.pcbi.1006457 (2018).

- 833 20 Haas, B. J. *et al.* STAR-Fusion: Fast and Accurate Fusion Transcript Detection from RNA-Seq.  
834 *bioRxiv*, 120295, doi:10.1101/120295 (2017).
- 835 21 Benelli, M. *et al.* Discovering chimeric transcripts in paired-end RNA-seq data by using  
836 EricScript. *Bioinformatics* **28**, 3232-3239, doi:10.1093/bioinformatics/bts617 (2012).
- 837 22 McPherson, A. *et al.* deFuse: an algorithm for gene fusion discovery in tumor RNA-Seq data.  
838 *PLoS computational biology* **7**, e1001138, doi:10.1371/journal.pcbi.1001138 (2011).
- 839 23 DePristo, M. A. *et al.* A framework for variation discovery and genotyping using next-generation  
840 DNA sequencing data. *Nature genetics* **43**, 491-498, doi:10.1038/ng.806 (2011).
- 841 24 Burrows, S. R., Rossjohn, J. & McCluskey, J. Have we cut ourselves too short in mapping CTL  
842 epitopes? *Trends Immunol* **27**, 11-16, doi:10.1016/j.it.2005.11.001 (2006).
- 843 25 Altschul, S. F., Gish, W., Miller, W., Myers, E. W. & Lipman, D. J. Basic local alignment search  
844 tool. *J Mol Biol* **215**, 403-410, doi:10.1016/S0022-2836(05)80360-2 (1990).
- 845 26 Shen, L., Zhang, J., Lee, H., Batista, M. T. & Johnston, S. A. RNA Transcription and Splicing  
846 Errors as a Source of Cancer Frameshift Neoantigens for Vaccines. *Sci Rep* **9**, 14184,  
847 doi:10.1038/s41598-019-50738-4 (2019).
- 848 27 Krokhin, O. V. & Spicer, V. Peptide retention standards and hydrophobicity indexes in reversed-  
849 phase high-performance liquid chromatography of peptides. *Anal Chem* **81**, 9522-9530,  
850 doi:10.1021/ac9016693 (2009).
- 851 28 Wen, B., Li, K., Zhang, Y. & Zhang, B. Cancer neoantigen prioritization through sensitive and  
852 reliable proteogenomics analysis. *Nat Commun* **11**, 1759, doi:10.1038/s41467-020-15456-w  
853 (2020).
- 854 29 Meier, F., Geyer, P. E., Virreira Winter, S., Cox, J. & Mann, M. BoxCar acquisition method  
855 enables single-shot proteomics at a depth of 10,000 proteins in 100 minutes. *Nature methods* **15**,  
856 440-448, doi:10.1038/s41592-018-0003-5 (2018).
- 857 30 Robinson, G. *et al.* Novel mutations target distinct subgroups of medulloblastoma. *Nature* **488**,  
858 43-48, doi:10.1038/nature11213 (2012).
- 859 31 Adamson, D. C. *et al.* OTX2 is critical for the maintenance and progression of Shh-independent  
860 medulloblastomas. *Cancer research* **70**, 181-191, doi:10.1158/0008-5472.CAN-09-2331 (2010).
- 861 32 Di, C. *et al.* Identification of OTX2 as a medulloblastoma oncogene whose product can be  
862 targeted by all-trans retinoic acid. *Cancer research* **65**, 919-924 (2005).
- 863 33 Danilova, L. *et al.* The Mutation-Associated Neoantigen Functional Expansion of Specific T  
864 Cells (MANAFEST) Assay: A Sensitive Platform for Monitoring Antitumor Immunity. *Cancer*  
865 *Immunol Res* **6**, 888-899, doi:10.1158/2326-6066.CIR-18-0129 (2018).
- 866 34 Hont, A. B. *et al.* Immunotherapy of Relapsed and Refractory Solid Tumors With Ex Vivo  
867 Expanded Multi-Tumor Associated Antigen Specific Cytotoxic T Lymphocytes: A Phase I Study.  
868 *Journal of clinical oncology : official journal of the American Society of Clinical Oncology* **37**,  
869 2349-2359, doi:10.1200/JCO.19.00177 (2019).
- 870 35 Restifo, N. P., Dudley, M. E. & Rosenberg, S. A. Adoptive immunotherapy for cancer:  
871 harnessing the T cell response. *Nat Rev Immunol* **12**, 269-281, doi:10.1038/nri3191 (2012).
- 872 36 Northcott, P. A. *et al.* Medulloblastoma. *Nat Rev Dis Primers* **5**, 11, doi:10.1038/s41572-019-  
873 0063-6 (2019).
- 874 37 Galea, I. *et al.* An antigen-specific pathway for CD8 T cells across the blood-brain barrier. *J Exp*  
875 *Med* **204**, 2023-2030, doi:10.1084/jem.20070064 (2007).
- 876 38 Ransohoff, R. M., Kivisakk, P. & Kidd, G. Three or more routes for leukocyte migration into the  
877 central nervous system. *Nat Rev Immunol* **3**, 569-581, doi:10.1038/nri1130 (2003).
- 878 39 Sayour, E. J. & Mitchell, D. A. Immunotherapy for Pediatric Brain Tumors. *Brain Sci* **7**,  
879 doi:10.3390/brainsci7100137 (2017).
- 880 40 Platten, M. & Reardon, D. A. Concepts for Immunotherapies in Gliomas. *Semin Neurol* **38**, 62-  
881 72, doi:10.1055/s-0037-1620274 (2018).



- 882 41 Hu, Z. *et al.* Personal neoantigen vaccines induce persistent memory T cell responses and epitope  
883 spreading in patients with melanoma. *Nat Med* **27**, 515-525, doi:10.1038/s41591-020-01206-4  
884 (2021).
- 885 42 Lo, J. A. *et al.* Epitope spreading toward wild-type melanocyte-lineage antigens rescues  
886 suboptimal immune checkpoint blockade responses. *Science translational medicine* **13**,  
887 doi:10.1126/scitranslmed.abd8636 (2021).
- 888 43 Han, X. J. *et al.* Progress in Neoantigen Targeted Cancer Immunotherapies. *Front Cell Dev Biol*  
889 **8**, 728, doi:10.3389/fcell.2020.00728 (2020).
- 890 44 Polyakova, A., Kuznetsova, K. & Moshkovskii, S. Proteogenomics meets cancer immunology:  
891 mass spectrometric discovery and analysis of neoantigens. *Expert Rev Proteomics* **12**, 533-541,  
892 doi:10.1586/14789450.2015.1070100 (2015).
- 893 45 Chong, C. *et al.* Integrated proteogenomic deep sequencing and analytics accurately identify non-  
894 canonical peptides in tumor immunopeptidomes. *Nat Commun* **11**, 1293, doi:10.1038/s41467-  
895 020-14968-9 (2020).
- 896 46 Laumont, C. M. *et al.* Noncoding regions are the main source of targetable tumor-specific  
897 antigens. *Science translational medicine* **10**, doi:10.1126/scitranslmed.aau5516 (2018).
- 898 47 Zhao, L. *et al.* NONCODEV6: an updated database dedicated to long non-coding RNA  
899 annotation in both animals and plants. *Nucleic acids research* **49**, D165-D171,  
900 doi:10.1093/nar/gkaa1046 (2021).
- 901 48 Alspach, E. *et al.* MHC-II neoantigens shape tumour immunity and response to immunotherapy.  
902 *Nature* **574**, 696-701, doi:10.1038/s41586-019-1671-8 (2019).
- 903 49 Borst, J., Ahrends, T., Babala, N., Melief, C. J. M. & Kastentmuller, W. CD4(+) T cell help in  
904 cancer immunology and immunotherapy. *Nat Rev Immunol* **18**, 635-647, doi:10.1038/s41577-  
905 018-0044-0 (2018).
- 906 50 Brightman, S. E., Naradikian, M. S., Miller, A. M. & Schoenberger, S. P. Harnessing neoantigen  
907 specific CD4 T cells for cancer immunotherapy. *J Leukoc Biol* **107**, 625-633,  
908 doi:10.1002/JLB.5RI0220-603RR (2020).
- 909 51 Bijker, M. S. *et al.* Superior induction of anti-tumor CTL immunity by extended peptide vaccines  
910 involves prolonged, DC-focused antigen presentation. *Eur J Immunol* **38**, 1033-1042,  
911 doi:10.1002/eji.200737995 (2008).
- 912 52 Ma, W. *et al.* Long-Peptide Cross-Presentation by Human Dendritic Cells Occurs in Vacuoles by  
913 Peptide Exchange on Nascent MHC Class I Molecules. *J Immunol* **196**, 1711-1720,  
914 doi:10.4049/jimmunol.1501574 (2016).
- 915 53 Menager, J. *et al.* Cross-presentation of synthetic long peptides by human dendritic cells: a  
916 process dependent on ERAD component p97/VCP but Not sec61 and/or Derlin-1. *PloS one* **9**,  
917 e89897, doi:10.1371/journal.pone.0089897 (2014).
- 918 54 Rosalia, R. A. *et al.* Dendritic cells process synthetic long peptides better than whole protein,  
919 improving antigen presentation and T-cell activation. *Eur J Immunol* **43**, 2554-2565,  
920 doi:10.1002/eji.201343324 (2013).
- 921 55 Northcott, P. A. *et al.* The whole-genome landscape of medulloblastoma subtypes. *Nature* **547**,  
922 311-317, doi:10.1038/nature22973 (2017).
- 923 56 Waszak, S. M. *et al.* Spectrum and prevalence of genetic predisposition in medulloblastoma: a  
924 retrospective genetic study and prospective validation in a clinical trial cohort. *The Lancet.*  
925 *Oncology* **19**, 785-798, doi:10.1016/S1470-2045(18)30242-0 (2018).
- 926 57 Suzuki, H. *et al.* Recurrent noncoding U1 snRNA mutations drive cryptic splicing in SHH  
927 medulloblastoma. *Nature* **574**, 707-711, doi:10.1038/s41586-019-1650-0 (2019).
- 928 58 Aldosari, N. *et al.* Comprehensive molecular cytogenetic investigation of chromosomal  
929 abnormalities in human medulloblastoma cell lines and xenograft. *Neuro-oncology* **4**, 75-85,  
930 doi:10.1093/neuonc/4.2.75 (2002).

- 931 59 McKenna, A. *et al.* The Genome Analysis Toolkit: a MapReduce framework for analyzing next-  
932 generation DNA sequencing data. *Genome research* **20**, 1297-1303, doi:10.1101/gr.107524.110  
933 (2010).
- 934 60 Van der Auwera, G. A. *et al.* From FastQ data to high confidence variant calls: the Genome  
935 Analysis Toolkit best practices pipeline. *Curr Protoc Bioinformatics* **43**, 11 10 11-33,  
936 doi:10.1002/0471250953.bi1110s43 (2013).
- 937 61 Li, H. & Durbin, R. Fast and accurate short read alignment with Burrows-Wheeler transform.  
938 *Bioinformatics* **25**, 1754-1760, doi:10.1093/bioinformatics/btp324 (2009).
- 939 62 Dobin, A. *et al.* STAR: ultrafast universal RNA-seq aligner. *Bioinformatics* **29**, 15-21,  
940 doi:10.1093/bioinformatics/bts635 (2013).
- 941 63 Wang, X. & Zhang, B. customProDB: an R package to generate customized protein databases  
942 from RNA-Seq data for proteomics search. *Bioinformatics* **29**, 3235-3237,  
943 doi:10.1093/bioinformatics/btt543 (2013).
- 944 64 Cotto, K. C. *et al.* RegTools: Integrated analysis of genomic and transcriptomic data for the  
945 discovery of splicing variants in cancer. *bioRxiv*, 436634, doi:10.1101/436634 (2020).

946

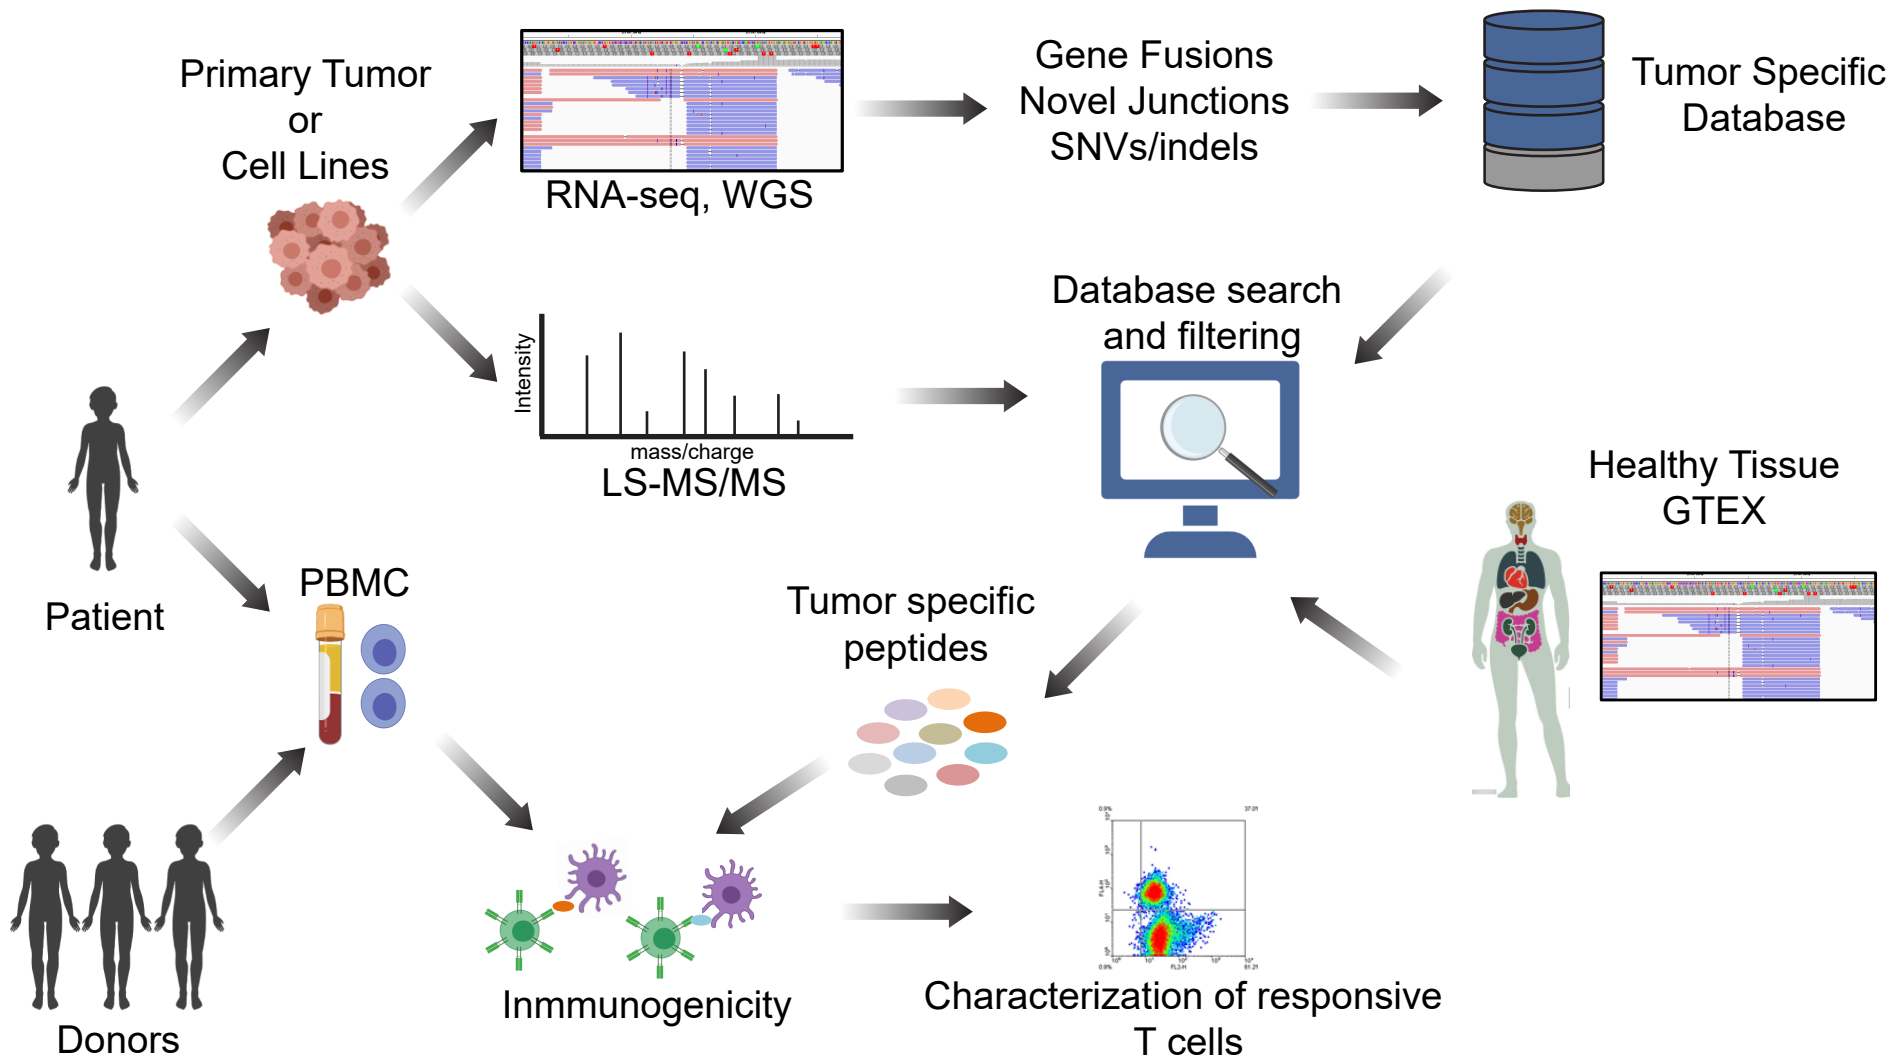

**Fig. 1. Proteogenomic approach to identify tumor-specific antigens in pediatric brain tumors.** Schematic representation of the entire workflow is shown. Tumor tissue samples were obtained from patients, and WGS and RNA-seq were performed to identify tumor-specific genomic aberrations (SNV/indels, novel junctions and fusions). Protein lysates were subjected to LC-MS/MS shotgun proteomics and spectra were searched against tumor-specific databases originating from tumor WGS and RNA-seq. MS-identified peptides were filtered using genomic and proteomic data from normal tissues to eliminate potential non-annotated normal proteins. Finally, to evaluate tumor-specific novel peptides for immunogenicity, autologous and allogeneic T cells were selected and expanded against the peptides and characterized for phenotype and function.

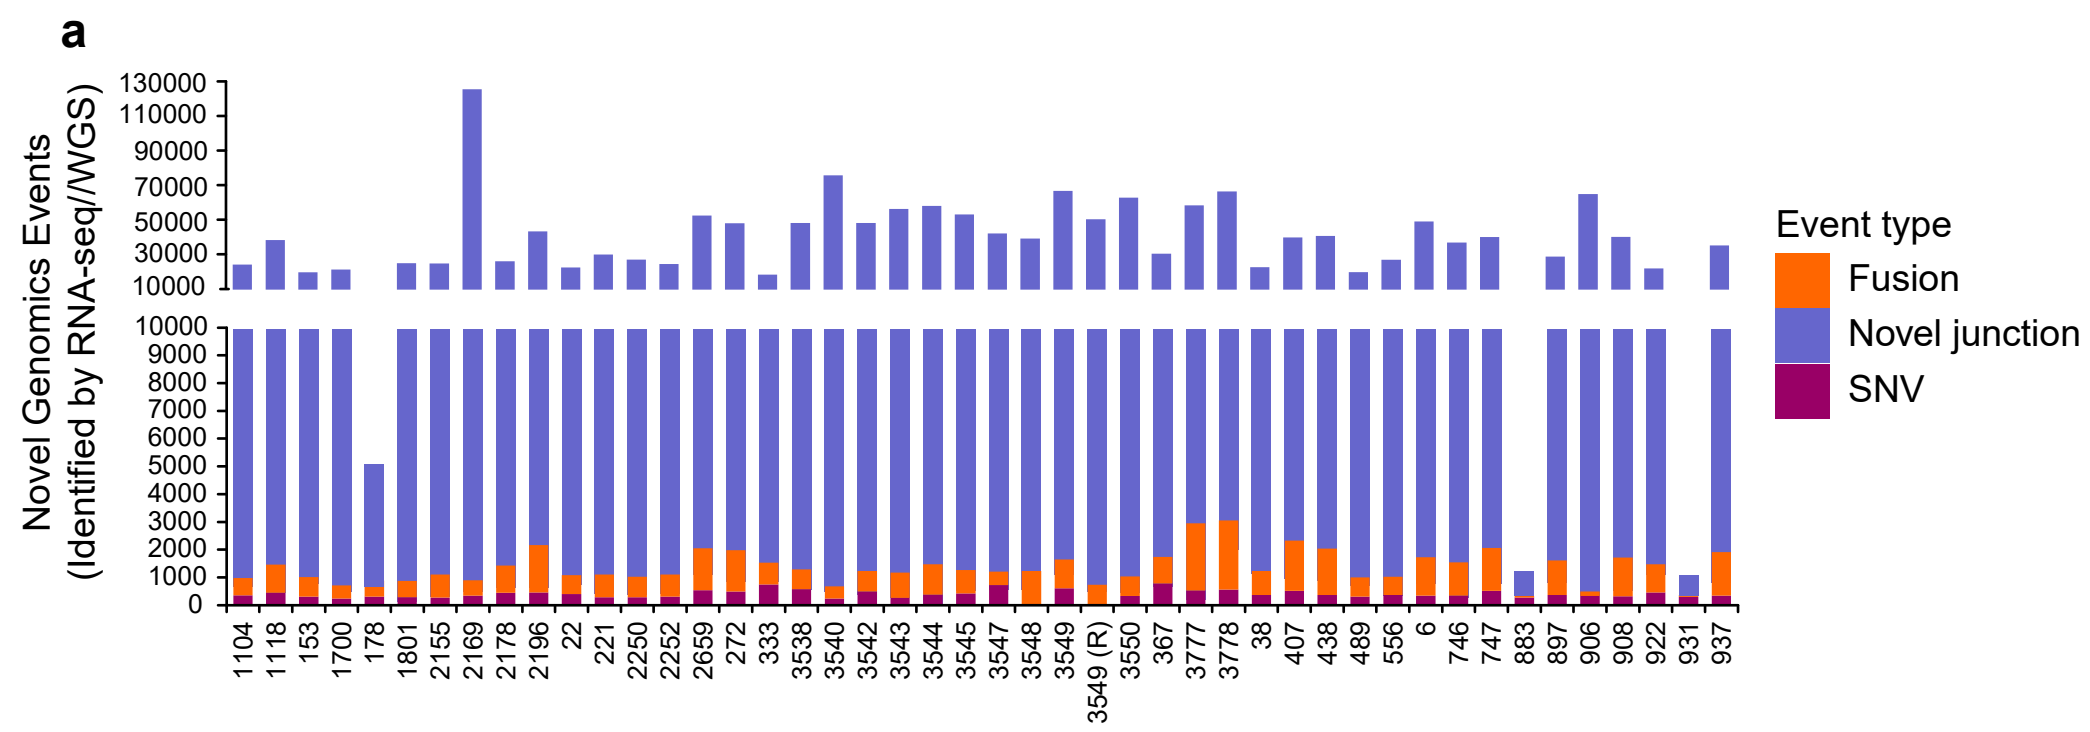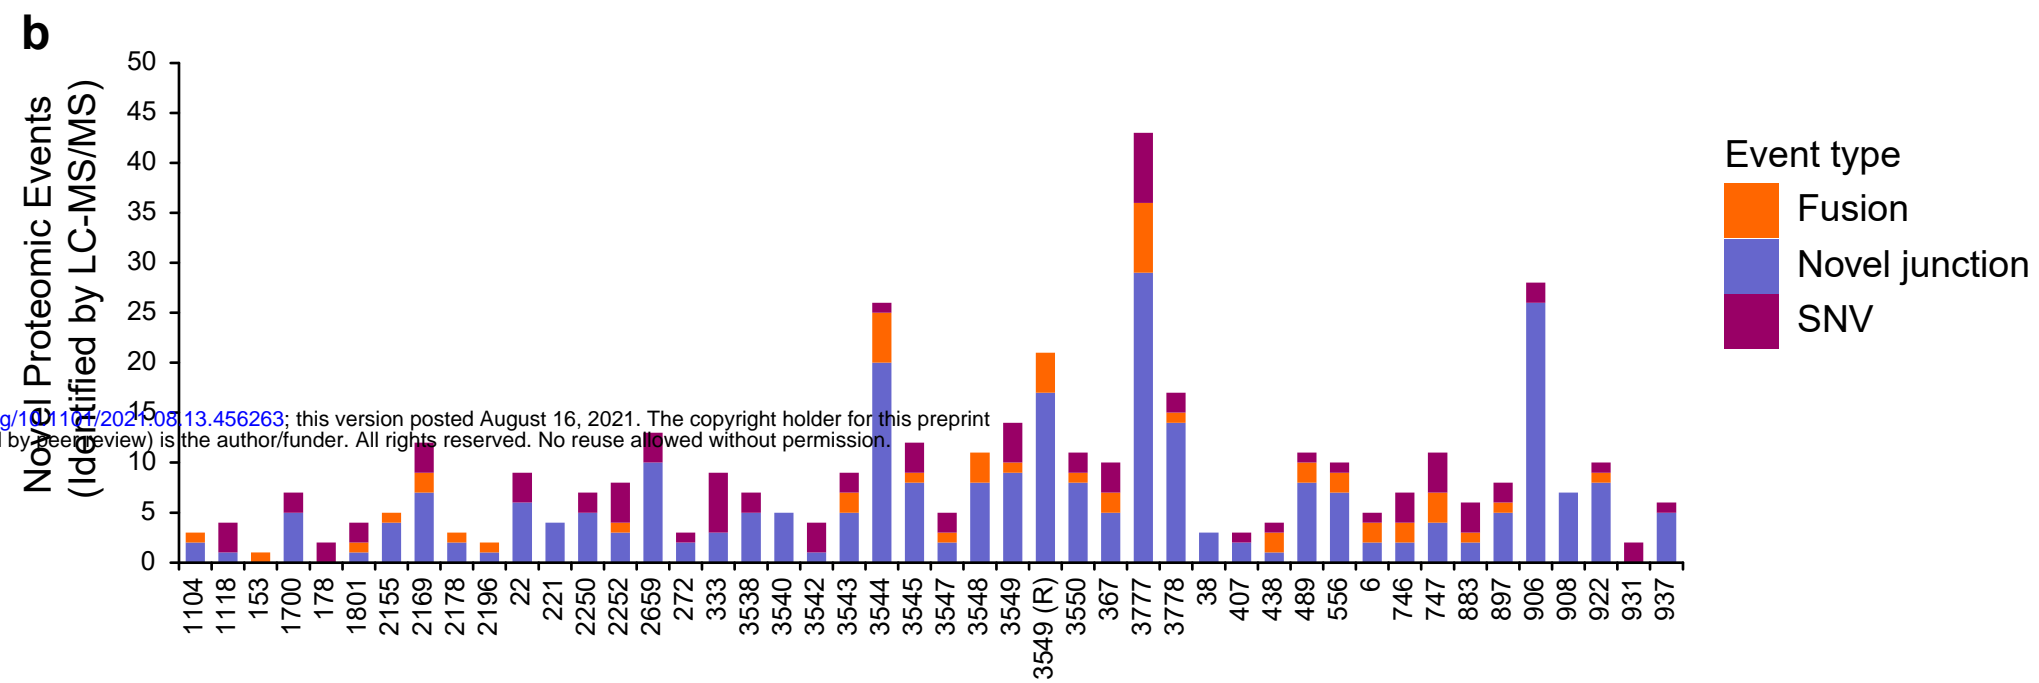

bioRxiv preprint doi: <https://doi.org/10.1101/2021.08.13.456263>; this version posted August 16, 2021. The copyright holder for this preprint (which was not certified by peer review) is the author/funder. All rights reserved. No reuse allowed without permission.

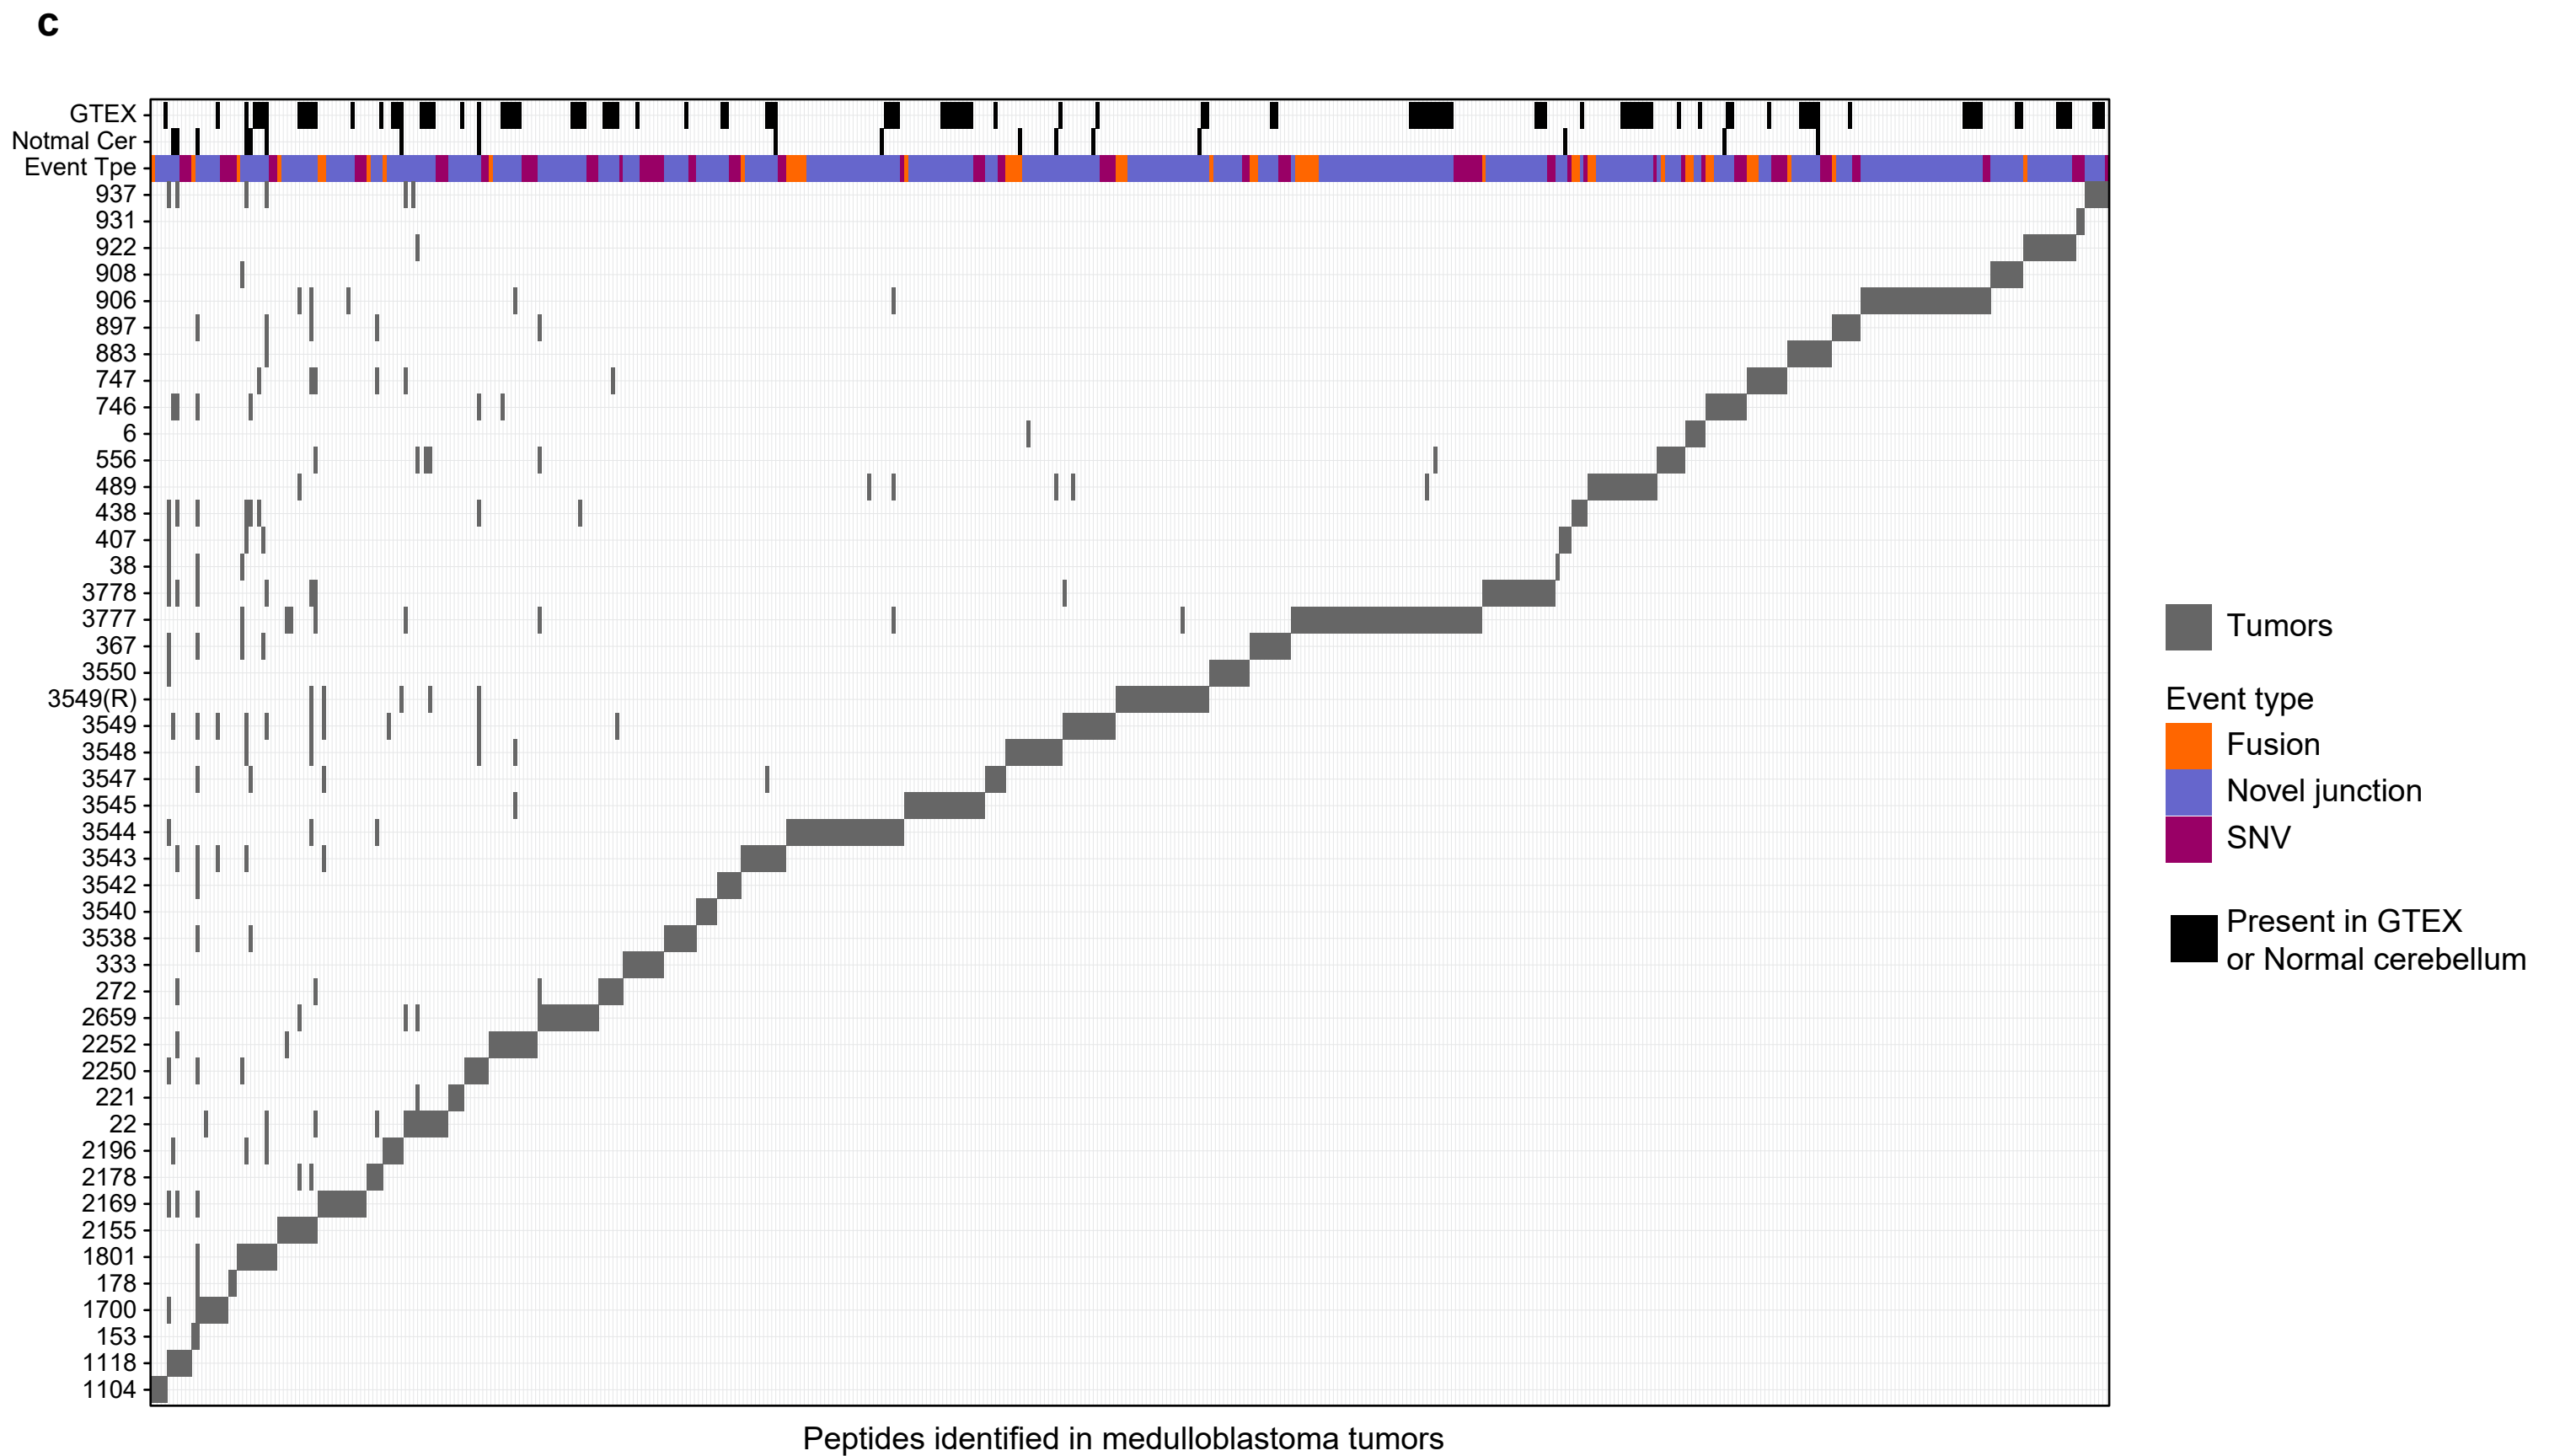

**Fig. 2. Novel genomic and proteomic events in 46 medulloblastoma tumors.** The number of (a) genomic (detected by RNA-seq/WGS) and (b) proteomic (detected by LC-MS/MS) novel events are shown for 46 medulloblastoma tumors. The type of tumor-specific genomic events is indicated: SNV/indels (purple), novel junctions (blue) and gene fusions (orange). The number of identified novel peptides ranged from 1 to 43 peptides per tumor with a mean of 9 peptides per tumor. **c** Tile plot depicting the number of novel peptides identified in medulloblastoma tumors. Black tiles indicate unannotated peptides identified in healthy cerebellum or normal tissues from GTEx. SNVs, fusions and novel junctions are shown in purple, orange, and blue respectively. Each gray tile represents a peptide, although some peptides are found in multiple tumors, the vast majority are tumor-specific.

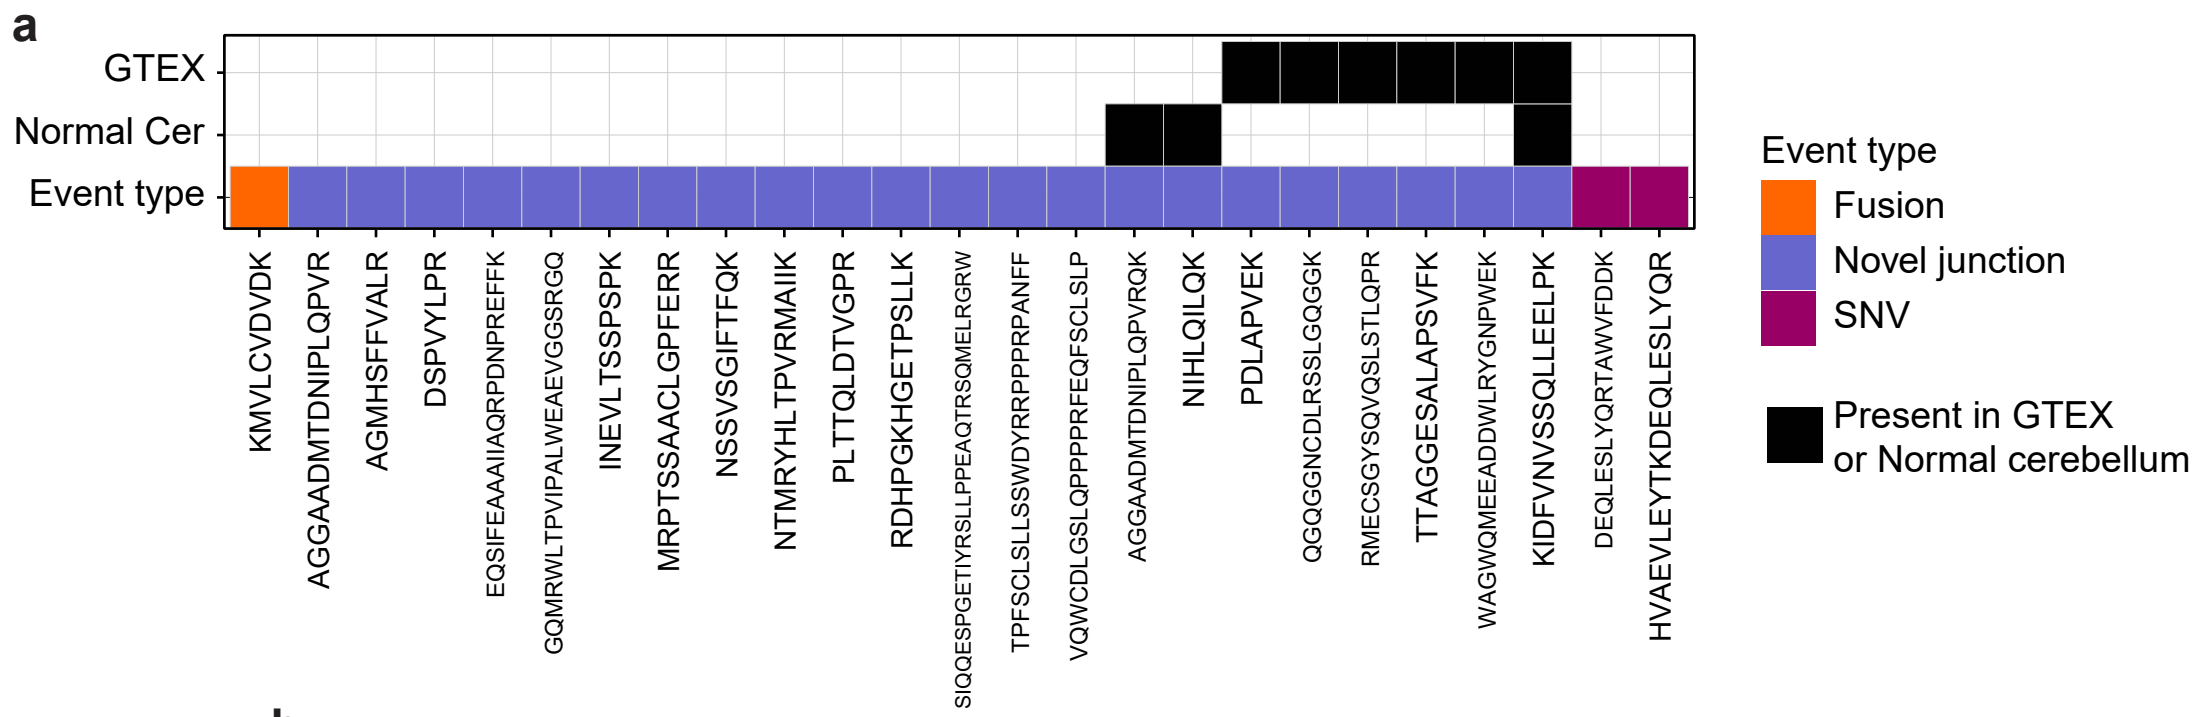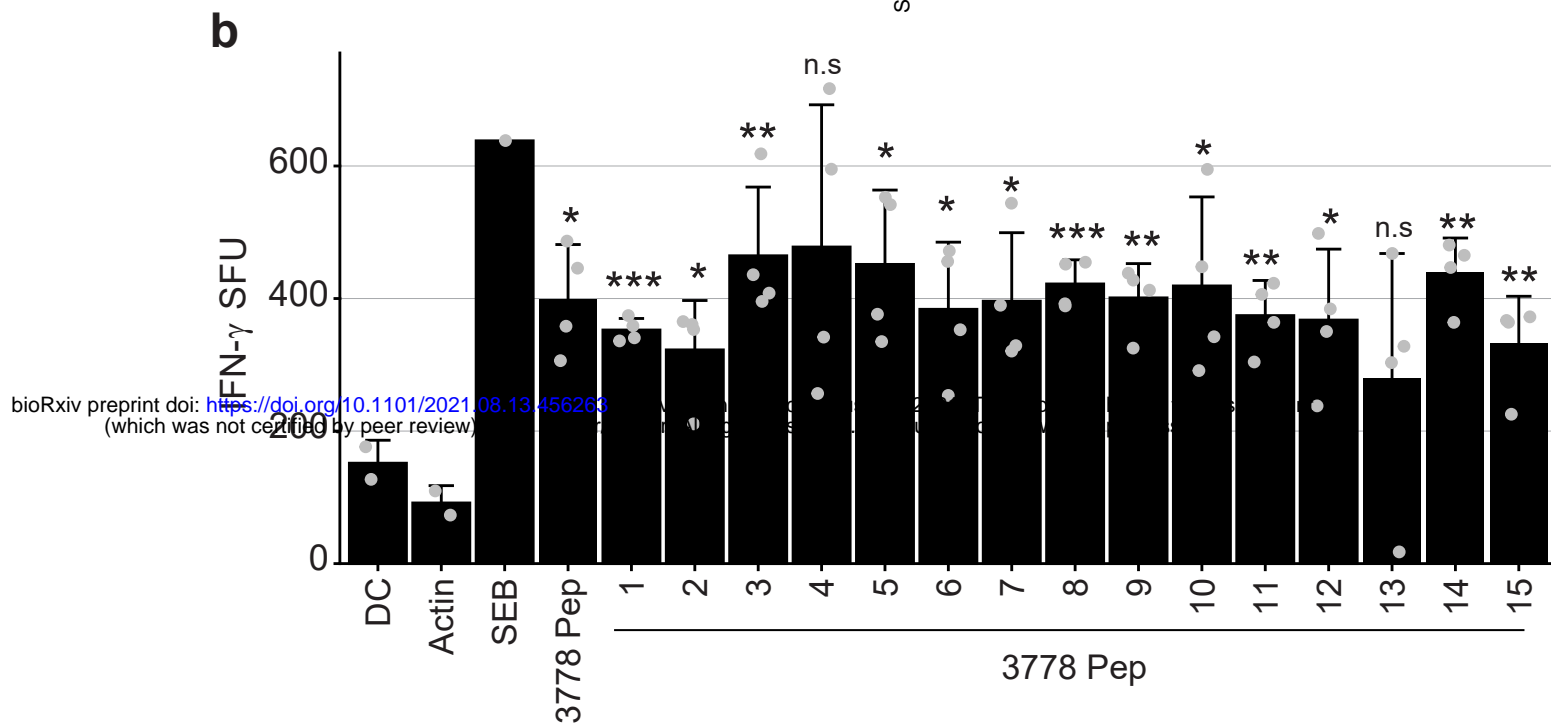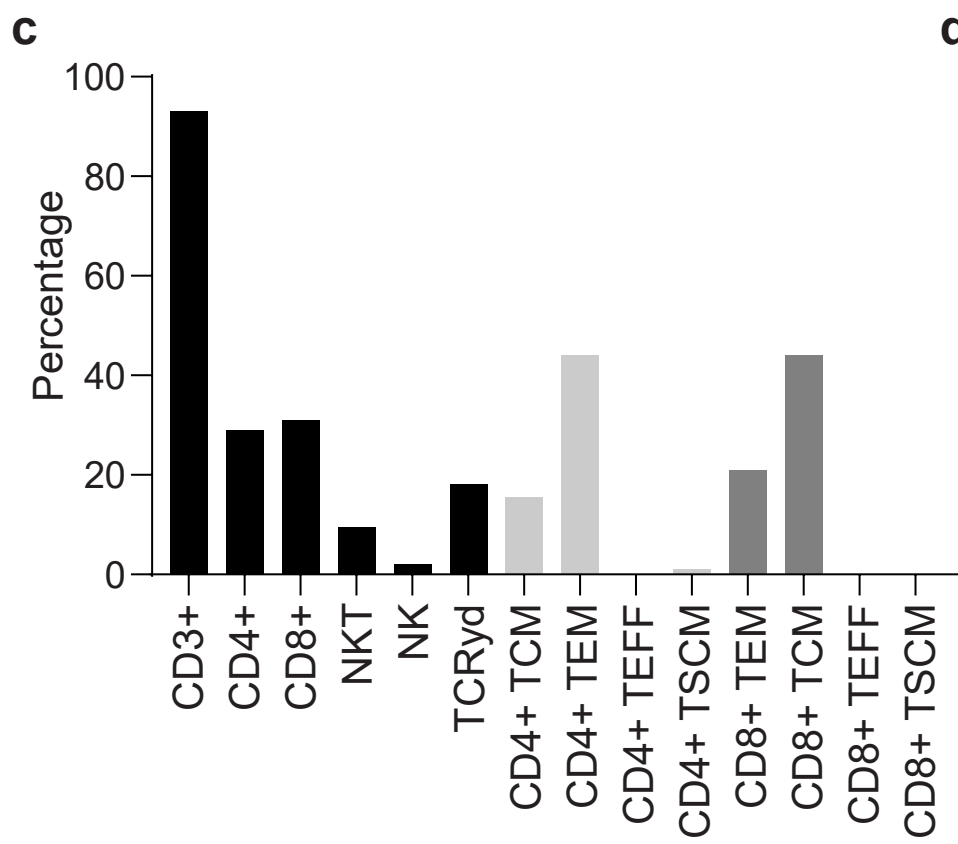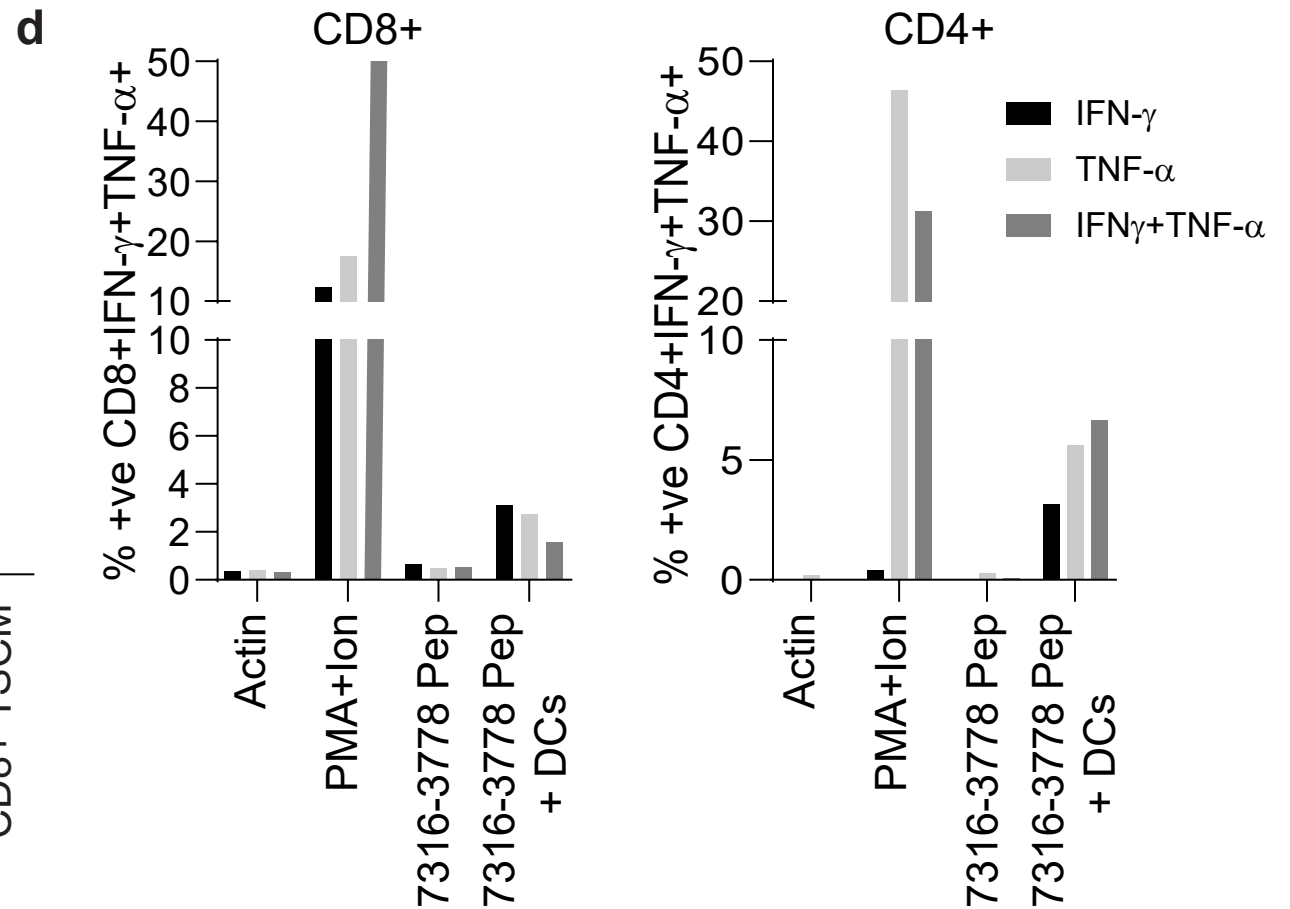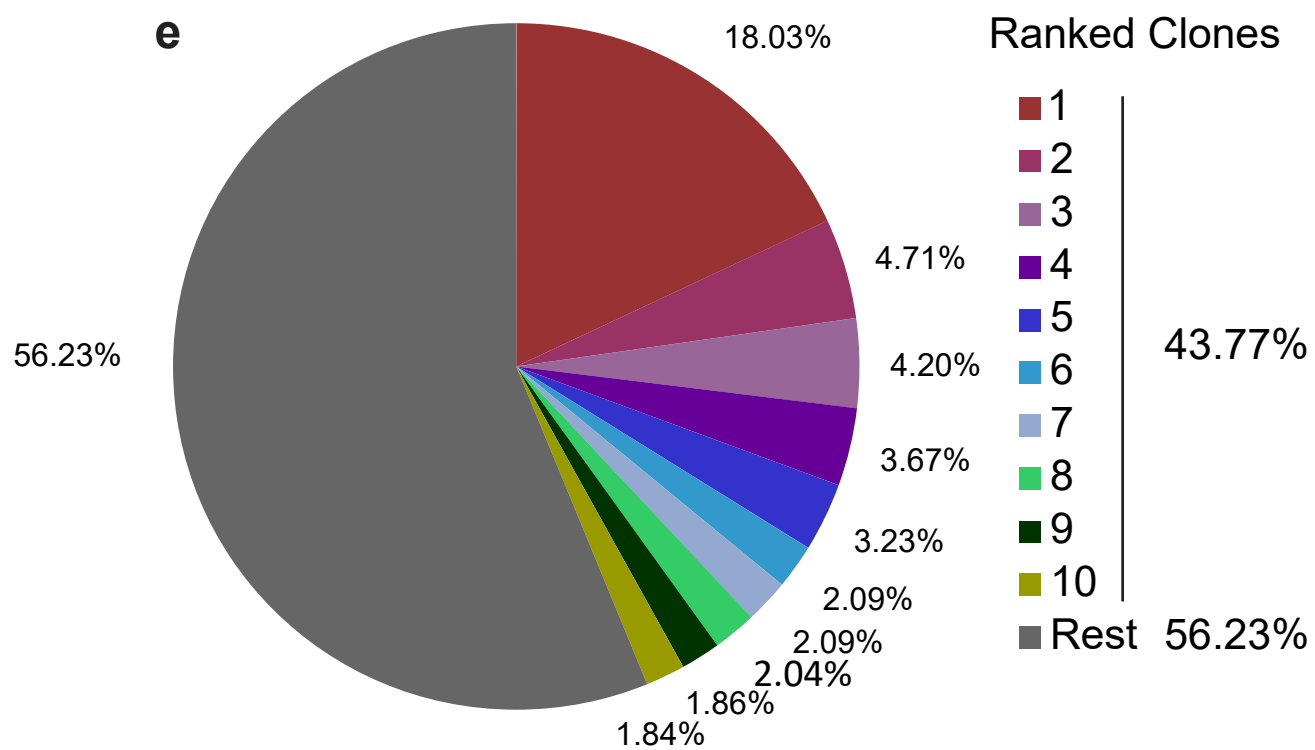

**Fig. 3. Autologous tumor-specific peptides induce a specific IFN- $\gamma$  response.** **a** Tile plot depicting the number of novel peptides identified in patient 7316-3778's tumor. Black tiles indicate the unannotated peptides identified in healthy cerebellar or normal tissues from GTEX. SNVs, fusions and novel junctions are displayed in purple, orange, and blue respectively. **b** Dendritic cells derived from patient 7316-3778 were loaded with peptides identified in the subject's tumor by our proteogenomic pipeline. DCs were co-cultured with non-adherent cells as described. Following 3 stimulations, peptide-specific responses were assessed by anti-IFN- $\gamma$  ELISpot. In the presence of peptide-loaded DCs, a significant anti-IFN- $\gamma$  response was observed against 13/15 peptides. One-sided t-test was used to calculate the p-values, n=4. p-values are indicated by stars, \*p-value<0.05, \*\*p-value< 0.01, \*\*\*p-value<0.001, n.s.=non-significant. **c** Summary data of patient TSAT phenotype, memory and differentiation status. Gating strategy TSAT populations and phenotypes (Figure S15). **d** To assess CD4- and CD8-specific cytokine function, TSAT were incubated in the presence of pooled peptides or peptide-loaded DCs. Summary of intracellular staining data showing specific CD4+ and CD8+ responses to 7316-3778 peptides in the presence of peptide-loaded DCs. Gating strategy for intracellular staining (Figure S15). **e** Results of TCR V $\beta$  CDR3 sequencing on the 7316-3778 TSA T product. Pie chart of the top 10 clonotypes in the TSA T. Clonotypes are listed in Table S5. SFU: spot-forming units; 1 SFU = 1 T cell secreting IFN- $\gamma$ . Actin: specific peptide control; PMA/Ionomycin positive control. Error bars represent one standard deviation (SD).



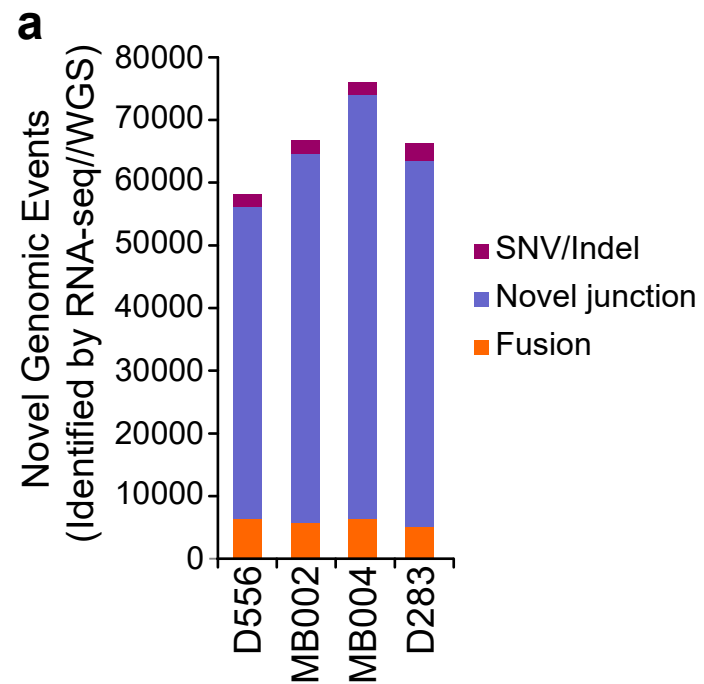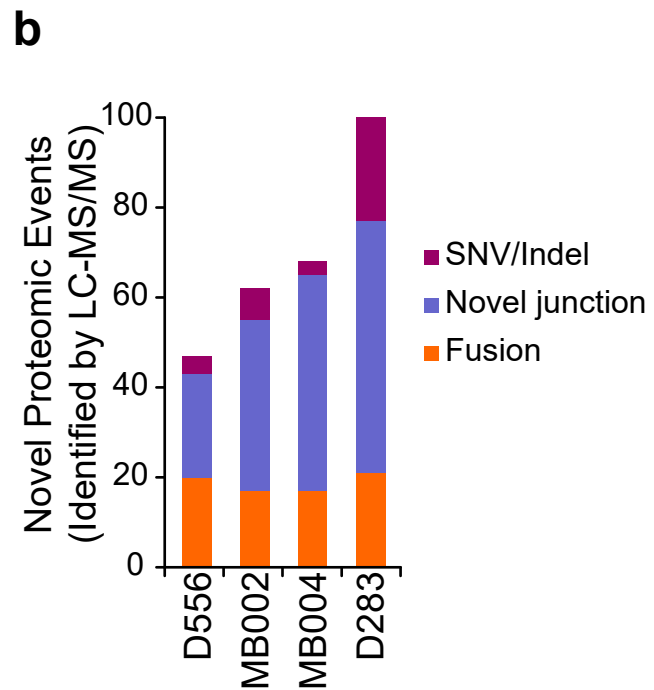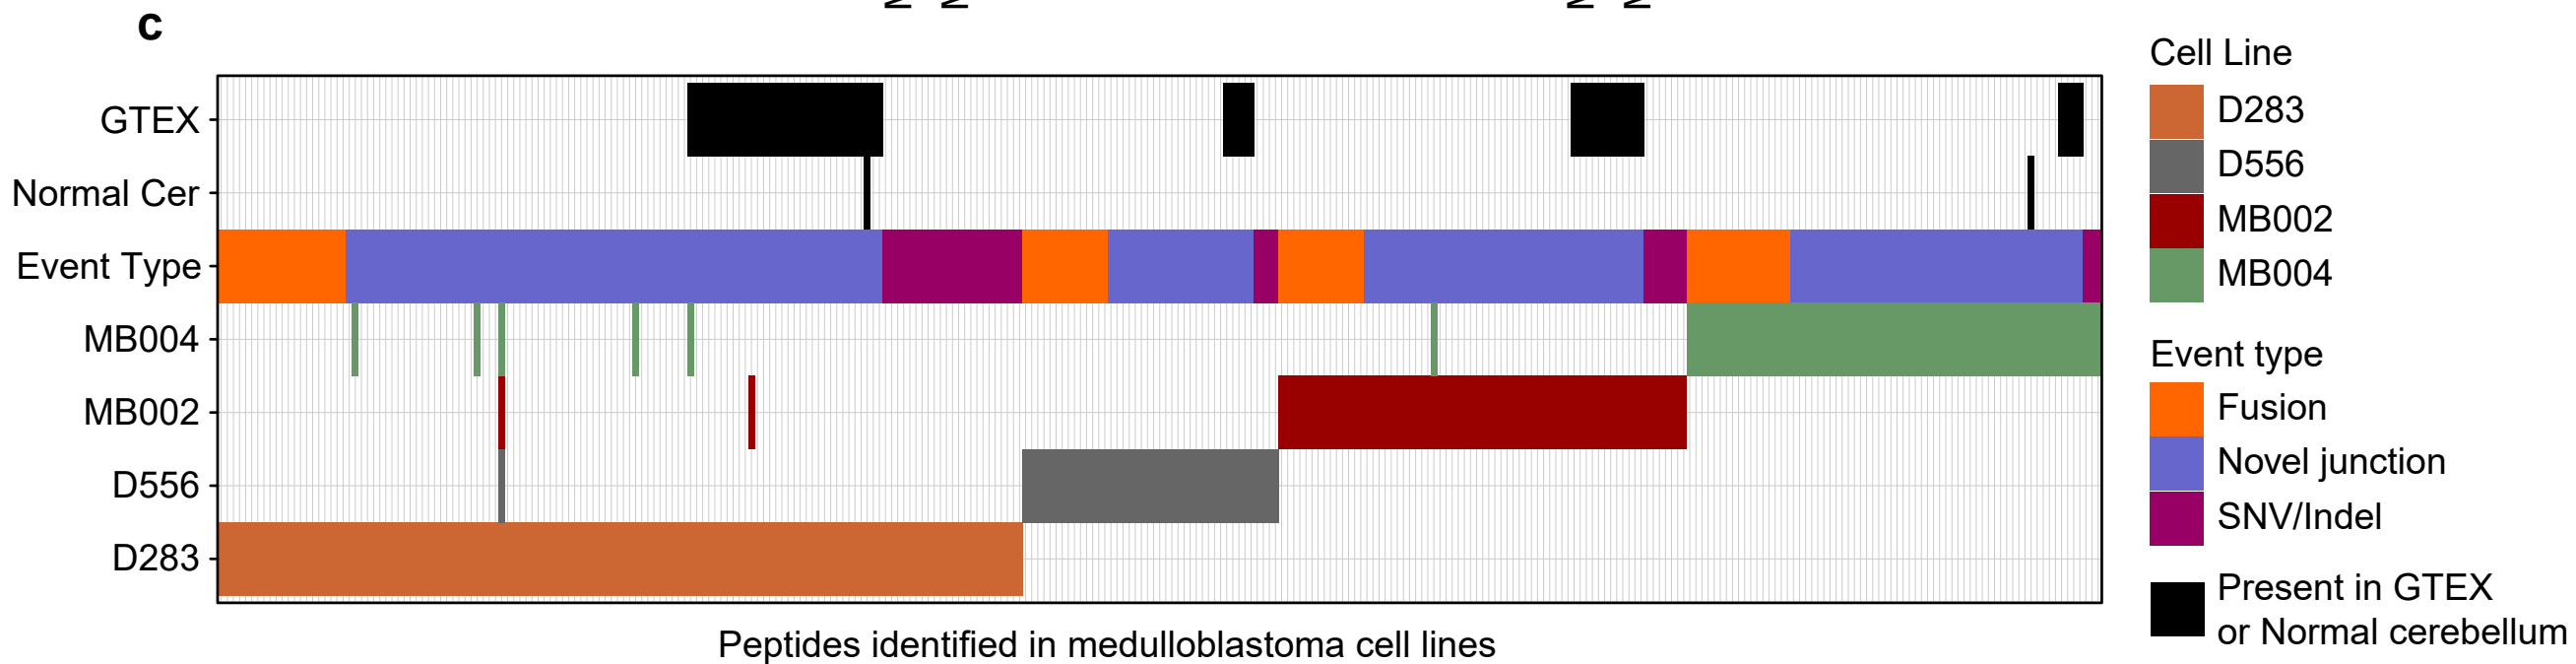

**Fig. 4. Novel genomic and proteomic events in medulloblastoma cells lines.** The number of (a) genomic (detected by RNA-seq/WGS) and (b) proteomic (detected by LC-MS/MS) novel events are shown for D556, MB002, MB004 and D283 medulloblastoma cell lines. The type of tumor-specific genomic events is indicated: SNV/indels (purple), novel junctions (blue) and gene fusions (orange). **c** Tile plot depicting the number of novel peptides identified in medulloblastoma cell lines. Black tiles indicate unannotated peptides identified in healthy cerebellum or normal tissues from GTEX. SNVs, fusions and novel junctions are shown in green, red, and blue respectively.

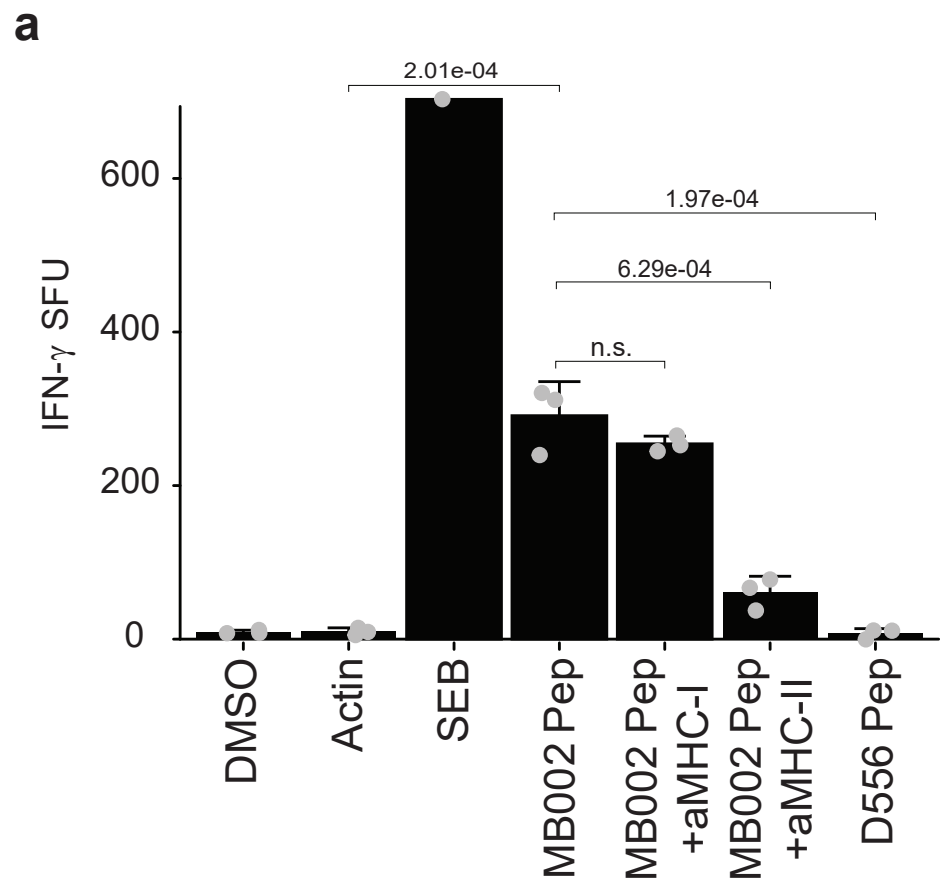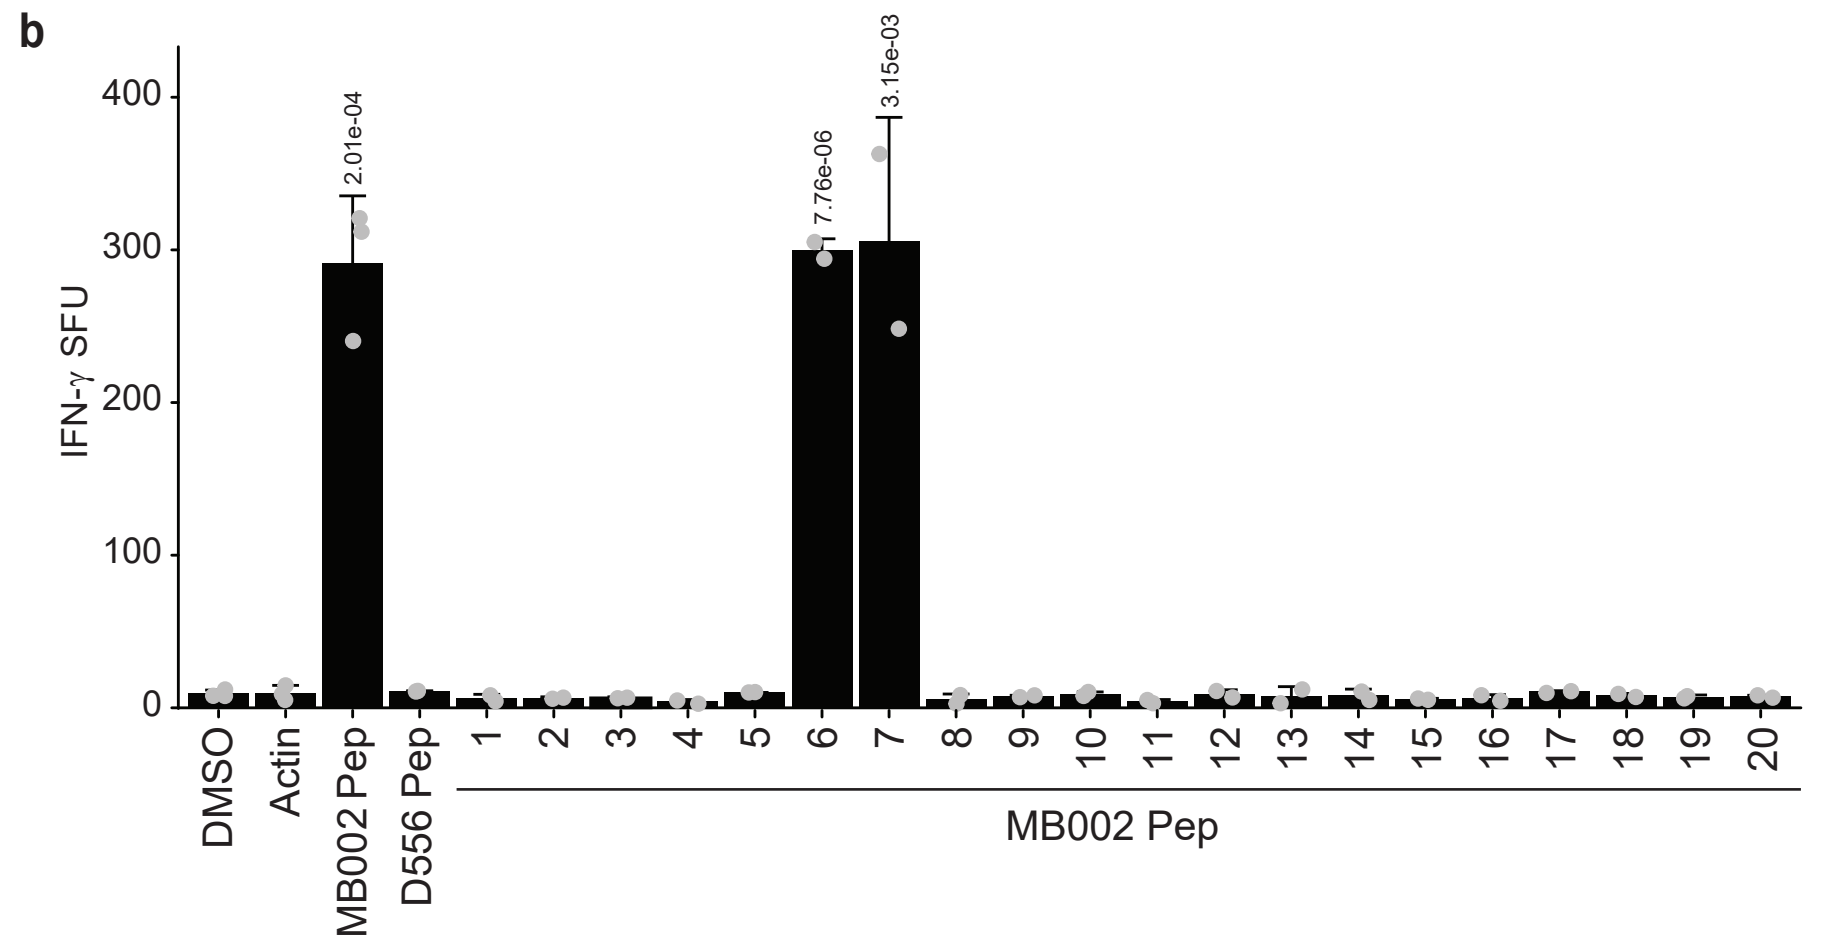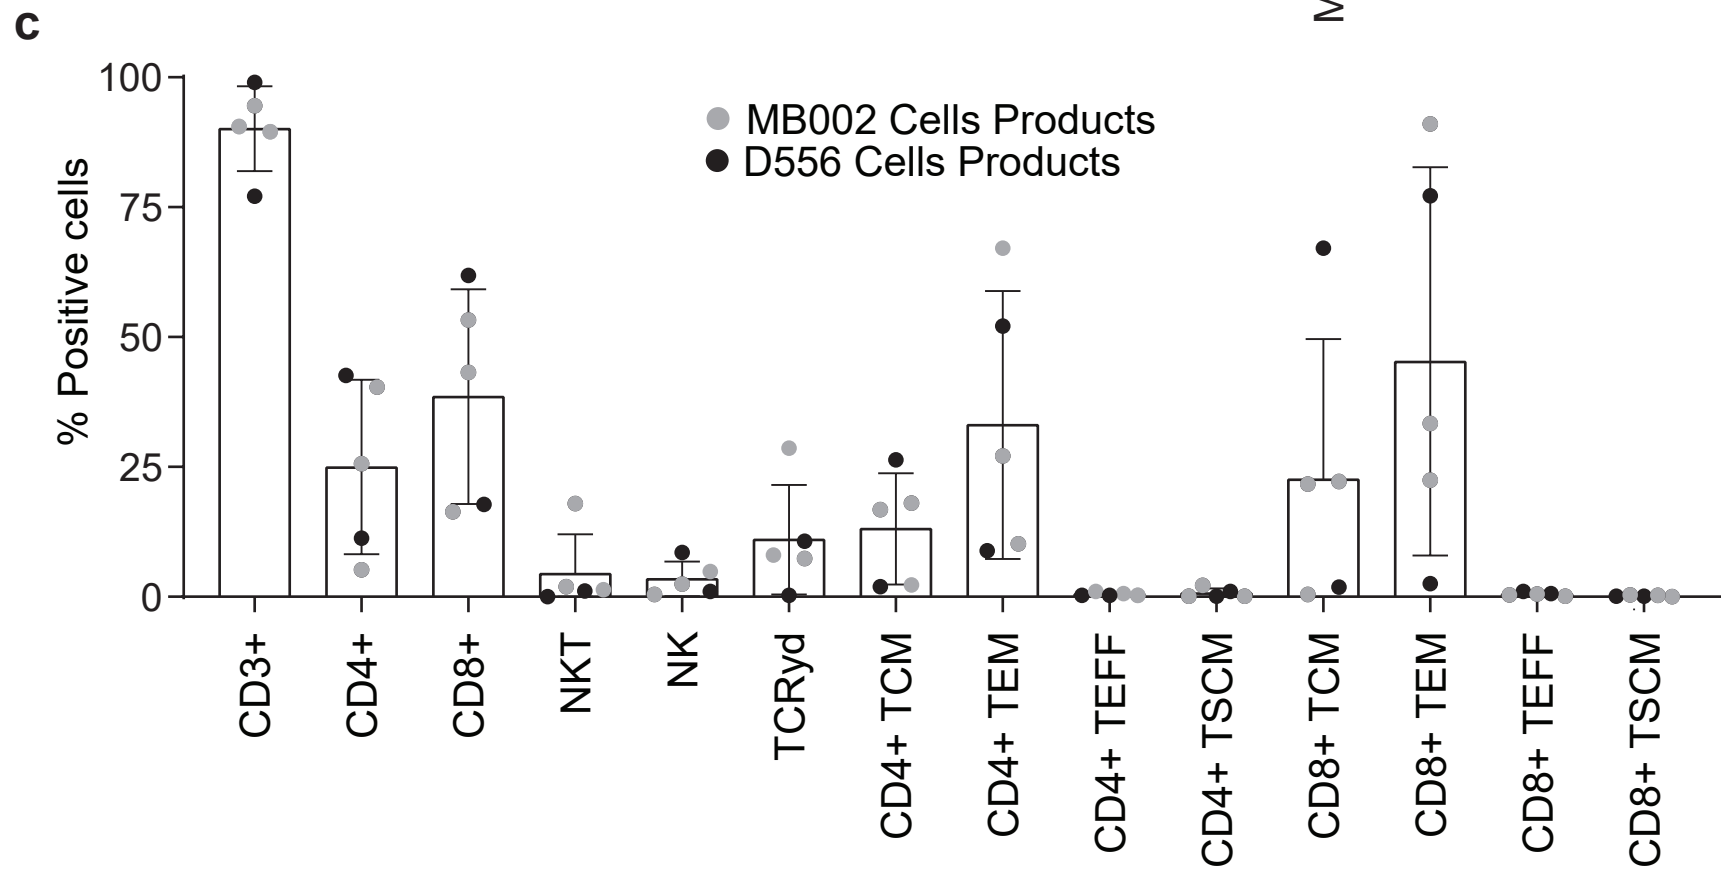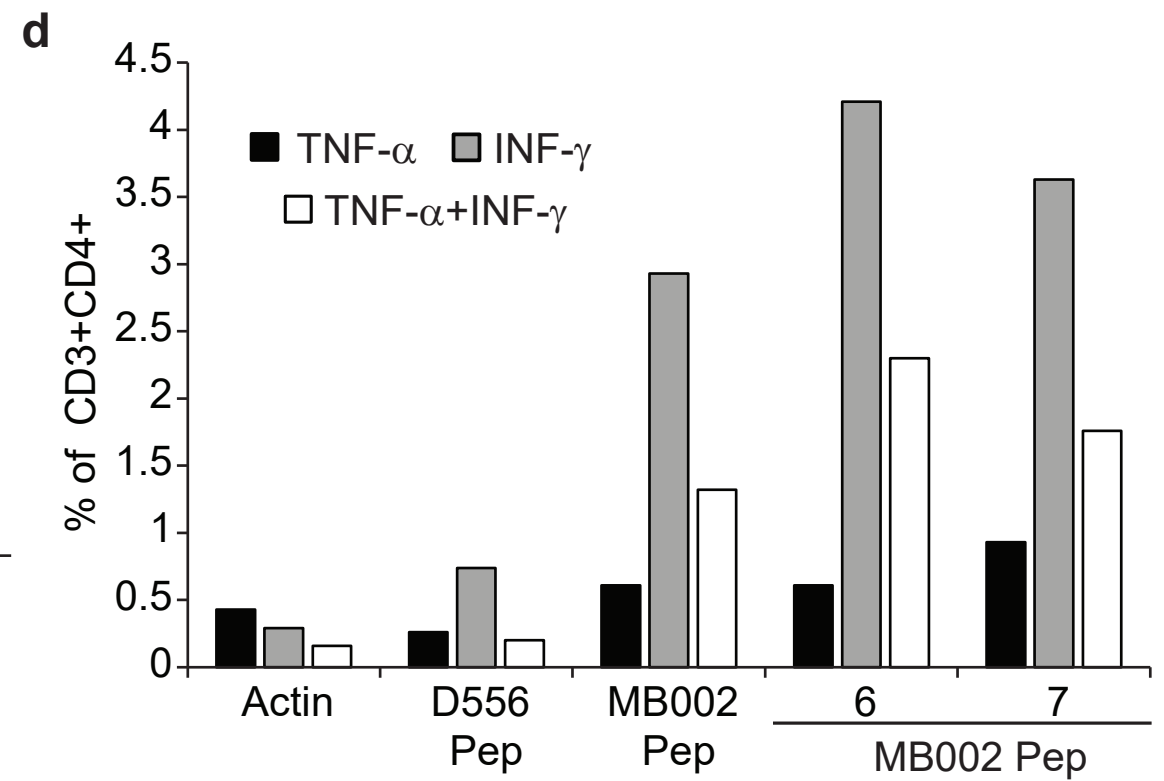

**Fig. 5. MB002 cell line specific peptides induce peptide-specific, poly-functional Class II-mediated T cell IFN- $\gamma$  responses *in vitro*.** Dendritic cells were loaded with MB002-specific peptides and co-cultured with non-adherent PBMCs. After 3 stimulations, peptide-specific T cell responses were analyzed by anti-IFN- $\gamma$  ELISpot. **a** Summary data of IFN- $\gamma$  response to pooled MB002 peptides in healthy donor 1. One-sided t-test was used to calculate the p-values, n=3. p-values are indicated the figure. **b** Summary data showing IFN- $\gamma$  response to individual MB002 peptides in healthy Donor 2. One-sided t-test was used to calculate the p-values, n=2. p-values are indicated the figure. **c** Summary data of MB002 and D556 TSATs populations and phenotypes (Error bars: mean + SD of 5 independent experiments). **d** Summary data showing CD4+ cytokine response to the pooled MB002 peptides and to the individual peptides 6 and 7 in the healthy donor 2. SFU: spot-forming units; 1 SFU = 1 T cell secreting IFN- $\gamma$ ; TSA T: Tumor-specific antigen T cell; a-MHC-I/II: anti-MHC Class I/II blocking antibodies; MB002 pep: pooled MB002 peptides; D556 pep: pooled D556 peptides; DMSO: dimethyl sulfoxide (peptide solvent; unstimulated control); actin: peptide specificity control; SEB: staphylococcus enterotoxin B (positive control). Gating strategy for intracellular staining (Supplementary Fig. 15). Gating strategy TSA T populations and phenotypes (Supplementary Fig.16). Error bars represent one standard deviation (SD).

**a**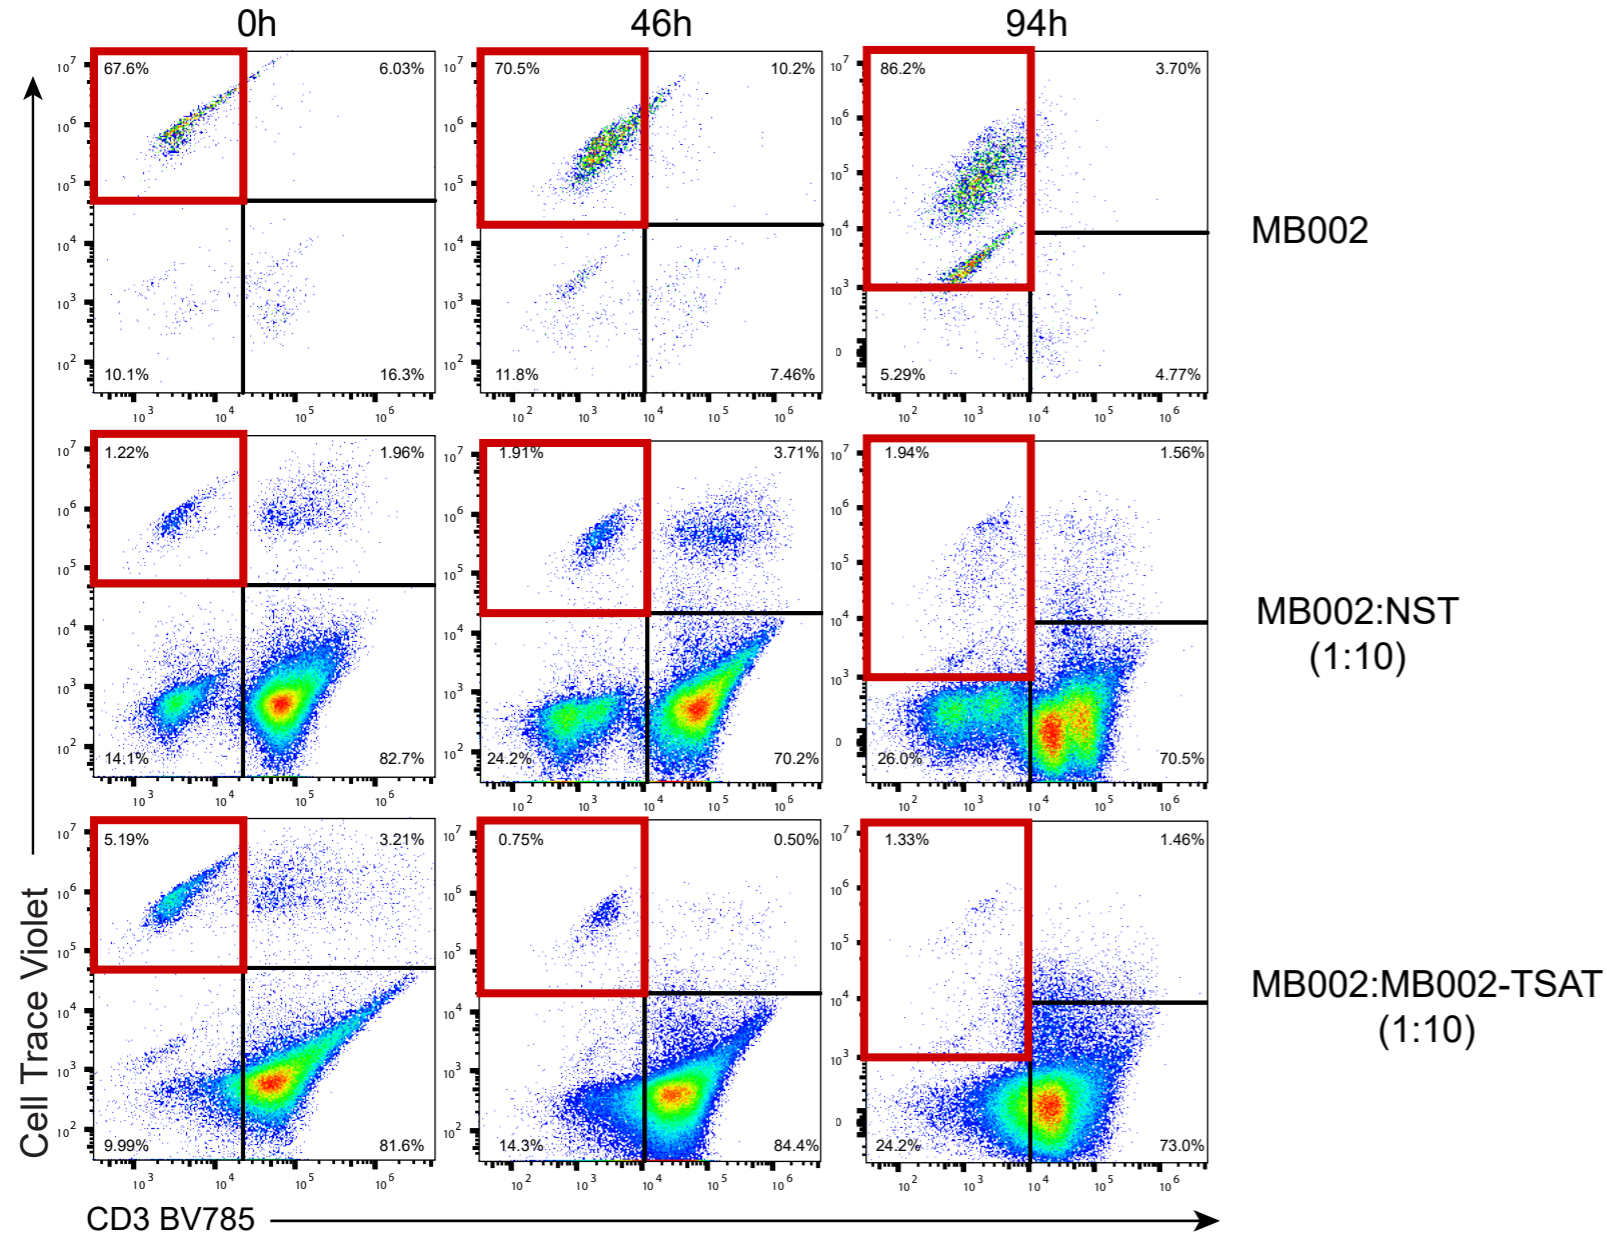**b**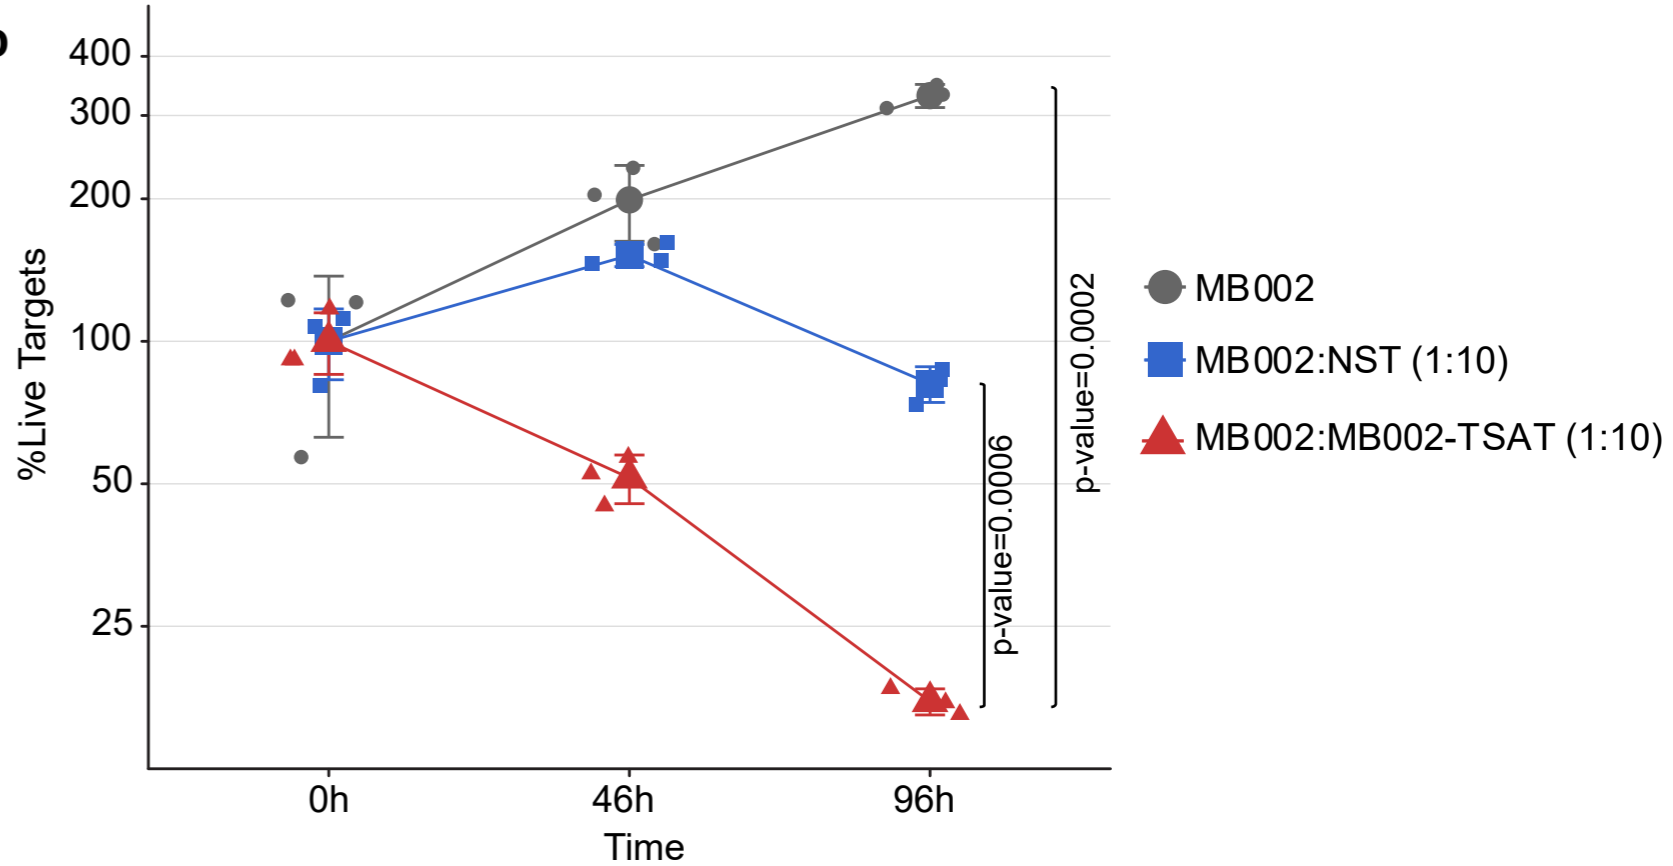

**Fig. 6. MB002 TSA T cells specifically lyse partially HLA-matched tumor cells.** To assess cytotoxic function, cryopreserved TSA T were thawed and rested overnight prior to plating with tumor targets. At the indicated time points, co-cultures were harvested and acquired as described in Materials & Methods. **a** Representative dot plots from one healthy donor showing proliferation of tumor targets in the absence of TSA T (top row), moderate reduction of tumor targets in the presence of non-specifically activated T cells (PHA blasts; middle row) and robust lysis of tumor targets in the presence of TSA T (bottom row). Lysis was determined based on the disappearance of targets from quadrant 1 (red border). **b** Summary data of a. NST: non-specific T cells (PHA blasts). One-way ANOVA p-values are shown. Values at each time point were normalized to 0 hours (100%). One-sided ANOVA test was used to calculate the p-values, n=3. p-values are indicated the figure. Gating strategy for expanded TSA T tumor cell cytotoxicity assays shown in Supplementary Fig.18. Error bars represent one standard deviation (SD).
